# Supplementary material
Source: PubMed Central journal article supplement (PMC7590978)
Supplement: jp0c02009_si_001.pdf [file jp0c02009_si_001.pdf]

## How Good is Jarzynski's Equality for Computer-Aided Drug Design?

Kiet Ho<sup>1,2,+</sup>, Duc Toan Truong<sup>1,2,+</sup>, and Mai Suan Li<sup>3,\*</sup>

<sup>1</sup>Institute for Computational Sciences and Technology, SBI building, Quang Trung Software City, Tan Chanh Hiep Ward, District 12, Ho Chi Minh City, Vietnam

<sup>2</sup>Department of Theoretical Physics, Faculty of Physics and Engineering Physics, Ho Chi Minh University of Science, Vietnam

<sup>3</sup>Institute of Physics, Polish Academy of Sciences, Al. Lotnikow 32/46, 02-668 Warsaw, Poland

+Contributed equally

\*Email: masli@ifpan.edu.pl

### Supporting information

**Table S1** - Inhibition constant, molecular weight, chemical formula and 2D structure of the 23 studied ligands of thrombin. Their ID is given in the third column, while the second column refers to PDB ID of their complex with thrombin protein.

| No. | PDB ID | Ligand ID | Inhibition constant Ki (nM) | Molecular weight (g/mol) | Chemical formular                                                                            | 2D structure                                                                                                                                                                                                                                                                                                                                                                                                                                                                                                                                           |
|-----|--------|-----------|-----------------------------|--------------------------|----------------------------------------------------------------------------------------------|--------------------------------------------------------------------------------------------------------------------------------------------------------------------------------------------------------------------------------------------------------------------------------------------------------------------------------------------------------------------------------------------------------------------------------------------------------------------------------------------------------------------------------------------------------|
| 1   | 1SL3   | 170       | 0.0014 <sup>1</sup>         | 552.32                   | C <sub>21</sub> H <sub>17</sub> C <sub>12</sub> F <sub>2</sub> N <sub>9</sub> O <sub>3</sub> | 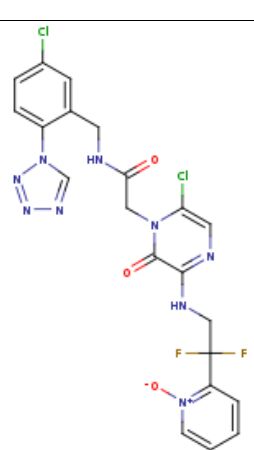 The chemical structure of ligand 170 is a complex molecule. It features a central pyridine ring substituted with a chlorine atom at the 2-position and a carbonyl group at the 4-position. This pyridine ring is connected via an amide bond to a benzimidazole ring system. Another amide bond connects the pyridine ring to a benzene ring substituted with a trifluoromethyl group (-CF <sub>3</sub> ) and a nitro group (-NO <sub>2</sub> ).                 |
| 2   | 1C4V   | IH2       | 0.016 <sup>2</sup>          | 528.64                   | C <sub>30</sub> H <sub>36</sub> N <sub>6</sub> O <sub>3</sub>                                |  The chemical structure of ligand IH2 is a complex molecule. It features a central benzimidazole ring system. One of the nitrogen atoms of the benzimidazole is substituted with a phenyl group. The other nitrogen atom is substituted with a cyclohexane ring, which is further substituted with an amino group (-NH <sub>2</sub> ) and a methyl group (-CH <sub>3</sub> ). The benzimidazole ring is also substituted with a carbonyl group and a methyl group. |

|   |      |     |                    |        |                                                                   |                                                                                      |
|---|------|-----|--------------------|--------|-------------------------------------------------------------------|--------------------------------------------------------------------------------------|
| 3 | 1C4U | IH1 | 0.043 <sup>2</sup> | 581.48 | C <sub>23</sub> H <sub>29</sub> BrN <sub>6</sub> O <sub>5</sub> S | 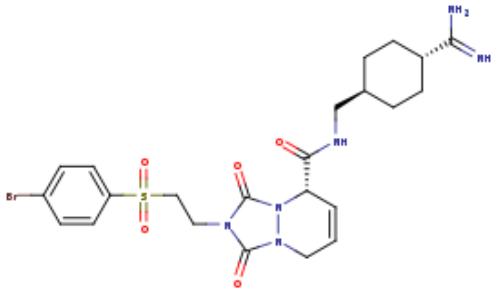   |
| 4 | 2ZO3 | 33U | 0.1 <sup>3</sup>   | 469.58 | C <sub>28</sub> H <sub>31</sub> N <sub>5</sub> O <sub>2</sub>     |   |
| 5 | 1TA6 | 177 | 0.74 <sup>4</sup>  | 479.01 | C <sub>24</sub> H <sub>35</sub> ClN <sub>4</sub> O <sub>4</sub>   |  |
| 6 | 1NT1 | T76 | 1.3 <sup>5</sup>   | 505.01 | C <sub>25</sub> H <sub>33</sub> ClN <sub>4</sub> O <sub>5</sub>   |  |

|   |      |     |                  |        |                                                                                |                                                                                                                                                                                                                                                                                                                                                                                                                                     |
|---|------|-----|------------------|--------|--------------------------------------------------------------------------------|-------------------------------------------------------------------------------------------------------------------------------------------------------------------------------------------------------------------------------------------------------------------------------------------------------------------------------------------------------------------------------------------------------------------------------------|
| 7 | 1BMN | BM9 | 3.6 <sup>6</sup> | 530.64 | C <sub>25</sub> H <sub>34</sub> N <sub>6</sub> O <sub>5</sub> S                | The structure shows a complex molecule with a piperidine ring substituted with an imidamide group (-NH-C(=NH)-NH <sub>2</sub> ) and a carbonyl group (-C(=O)-). This carbonyl is linked to a pyrrolidine ring, which is further substituted with a hydroxyl group (-OH) and a sulfonamide group (-NH-SO <sub>2</sub> -). The sulfonamide group is attached to a naphthalene ring system.                                            |
| 8 | 1ETS | MID | 6 <sup>7</sup>   | 521.63 | C <sub>27</sub> H <sub>31</sub> N <sub>5</sub> O <sub>4</sub> S                | The structure features a piperidine ring connected via a carbonyl group to a chiral center. This center is also bonded to a benzyl group (a methylene group attached to a benzene ring) and an amide group (-NH-C(=O)-). The amide group is further substituted with a sulfonamide group (-NH-SO <sub>2</sub> -) attached to a naphthalene ring, and an imidamide group (-NH-C(=NH)-NH <sub>2</sub> ) attached to the benzene ring. |
| 9 | 2JH6 | 894 | 17 <sup>8</sup>  | 449.97 | C <sub>17</sub> H <sub>24</sub> ClN <sub>3</sub> O <sub>5</sub> S <sub>2</sub> | The structure consists of a morpholine ring substituted with a carbonyl group (-C(=O)-). This carbonyl is linked to a chiral center that also bears a methyl group (-CH <sub>3</sub> ) and is connected to a pyrrolidine ring. The pyrrolidine ring is substituted with a sulfonamide group (-NH-SO <sub>2</sub> -) which is further attached to a propyl chain ending in a 2-chlorothiophene ring.                                 |

|    |      |     |                  |        |                                                                              |                                                                                      |
|----|------|-----|------------------|--------|------------------------------------------------------------------------------|--------------------------------------------------------------------------------------|
| 10 | 3DHK | 23U | 47 <sup>3</sup>  | 461.98 | C <sub>27</sub> H <sub>28</sub> C <sub>1</sub> N <sub>3</sub> O <sub>2</sub> | 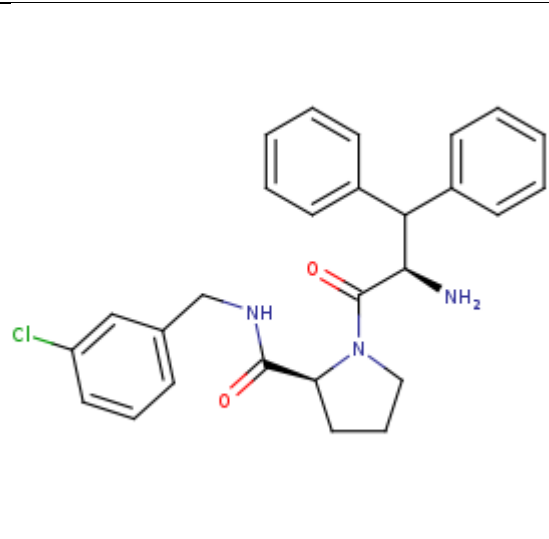   |
| 11 | 3DUX | 64U | 100 <sup>3</sup> | 391.94 | C <sub>21</sub> H <sub>30</sub> C <sub>1</sub> N <sub>3</sub> O <sub>2</sub> |   |
| 12 | 2ZC9 | 22U | 180 <sup>3</sup> | 385.89 | C <sub>21</sub> H <sub>24</sub> C <sub>1</sub> N <sub>3</sub> O <sub>2</sub> |  |
| 13 | 2ZGX | 29U | 180 <sup>3</sup> | 331.41 | C <sub>17</sub> H <sub>25</sub> N <sub>5</sub> O <sub>2</sub>                |  |

|    |      |     |                    |        |                                                                                             |                                                                                      |
|----|------|-----|--------------------|--------|---------------------------------------------------------------------------------------------|--------------------------------------------------------------------------------------|
| 14 | 2JH5 | 895 | 367 <sup>8</sup>   | 447.96 | C <sub>17</sub> H <sub>22</sub> C <sub>1</sub> N <sub>3</sub> O <sub>5</sub> S <sub>2</sub> | 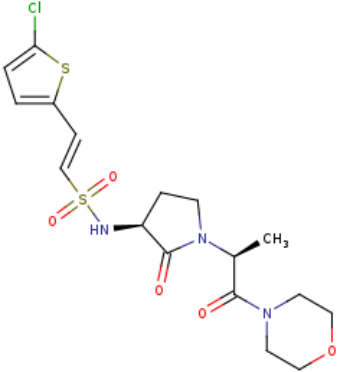   |
| 15 | 1AWH | GR3 | 830 <sup>9</sup>   | 542.70 | C <sub>32</sub> H <sub>46</sub> O <sub>7</sub>                                              |    |
| 16 | 1D6W | 00R | 1100 <sup>2</sup>  | 527.60 | C <sub>24</sub> H <sub>29</sub> N <sub>7</sub> O <sub>5</sub> S                             |   |
| 17 | 3SHC | B01 | 1900 <sup>10</sup> | 386.88 | C <sub>20</sub> H <sub>23</sub> C <sub>1</sub> N <sub>4</sub> O <sub>2</sub>                |  |
| 18 | 3SHA | P97 | 2600 <sup>10</sup> | 386.88 | C <sub>20</sub> H <sub>23</sub> C <sub>1</sub> N <sub>4</sub> O <sub>2</sub>                |  |

|    |      |     |                     |        |                                                                              |  |
|----|------|-----|---------------------|--------|------------------------------------------------------------------------------|--|
| 19 | 2ZFP | 19U | 6800 <sup>3</sup>   | 323.82 | C <sub>16</sub> H <sub>22</sub> C <sub>1</sub> N <sub>3</sub> O <sub>2</sub> |  |
| 20 | 3F68 | 91U | 8700 <sup>3</sup>   | 433.97 | C <sub>23</sub> H <sub>32</sub> C <sub>1</sub> N <sub>3</sub> O <sub>3</sub> |  |
| 21 | 3EGK | M18 | 22000 <sup>11</sup> | 410.89 | C <sub>20</sub> H <sub>27</sub> C <sub>1</sub> N <sub>2</sub> O <sub>5</sub> |  |
| 22 | 3P17 | 99P | 33400 <sup>10</sup> | 352.43 | C <sub>20</sub> H <sub>24</sub> N <sub>4</sub> O <sub>2</sub>                |  |
| 23 | 3SV2 | P05 | 64000 <sup>10</sup> | 352.43 | C <sub>20</sub> H <sub>24</sub> N <sub>4</sub> O <sub>2</sub>                |  |

**Table S2** - Inhibition constant, molecular weight, chemical formula and 2D structure of the 23 studied ligands of factor Xa. Their ID is given in the third column, while the second column refers to PDB ID of their complex with factor Xa protein.

| No. | PDB ID | Ligand ID | Inhibition constant Ki (nm) | Molecular weight (g/mol) | Chemical formula                                                                | 2D structure                                                                                                                                                                                                                                                                                                                                                                                                                                                                                                                                                                                                                                                                                    |
|-----|--------|-----------|-----------------------------|--------------------------|---------------------------------------------------------------------------------|-------------------------------------------------------------------------------------------------------------------------------------------------------------------------------------------------------------------------------------------------------------------------------------------------------------------------------------------------------------------------------------------------------------------------------------------------------------------------------------------------------------------------------------------------------------------------------------------------------------------------------------------------------------------------------------------------|
| 1   | 2P3T   | 993       | 0.005 <sup>12</sup>         | 565.68                   | C <sub>23</sub> H <sub>19</sub> C <sub>13</sub> N <sub>6</sub> O <sub>3</sub> S | 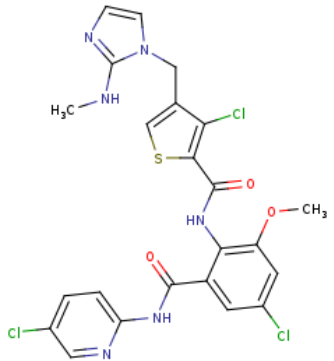 The structure shows a central benzimidazole ring system. One nitrogen is substituted with a methyl group (H <sub>3</sub> C). The benzimidazole is connected via a methylene bridge to a thiophene ring. The thiophene ring has a chlorine atom and a carbonyl group. The carbonyl is part of an amide linkage to another benzimidazole ring. This second benzimidazole has a methylamino group (NH-CH <sub>3</sub> ) and is further substituted with a methoxy group (O-CH <sub>3</sub> ) and a chlorine atom. A third benzimidazole ring is attached to the amide nitrogen, also featuring a chlorine atom. |
| 2   | 1MQ6   | XLD       | 0.007 <sup>13</sup>         | 568.86                   | C <sub>23</sub> H <sub>20</sub> C <sub>13</sub> N <sub>5</sub> O <sub>4</sub> S |  The structure features a central thiophene ring with a chlorine atom and a methylamino group (N-CH <sub>3</sub> ). It is connected via a methylene bridge to a benzimidazole ring. The benzimidazole ring has a methoxy group (H <sub>3</sub> C-O) and a carbonyl group. The carbonyl is part of an amide linkage to a benzimidazole ring with a chlorine atom. Another amide linkage connects the central thiophene ring to a benzimidazole ring with a chlorine atom.                                                                                                                                     |
| 3   | 3CS7   | LG0       | 0.021 <sup>14</sup>         | 510.55                   | C <sub>28</sub> H <sub>29</sub> F <sub>3</sub> N <sub>4</sub> O <sub>2</sub>    |  The structure is a complex heterocyclic system. It includes a benzimidazole ring with a trifluoromethyl group (CF <sub>3</sub> ) and a methoxy group (H <sub>3</sub> C-O). This is linked to a piperidine ring, which is further connected to a benzimidazole ring with a trifluoromethyl group. A cyclopropylmethyl group is attached to the piperidine ring, which is also linked to a benzimidazole ring with a trifluoromethyl group.                                                                                                                                                                  |
| 4   | 2FZZ   | 5QC       | 0.03 <sup>15</sup>          | 588.58                   | C <sub>31</sub> H <sub>27</sub> F <sub>3</sub> N <sub>6</sub> O <sub>3</sub>    |  The structure is a complex heterocyclic system. It includes a benzimidazole ring with a trifluoromethyl group (CF <sub>3</sub> ) and an amino group (H <sub>2</sub> N). This is linked to a piperidine ring, which is further connected to a benzimidazole ring with a trifluoromethyl group. A cyclopropylmethyl group is attached to the piperidine ring, which is also linked to a benzimidazole ring with a trifluoromethyl group. A hydroxyl group (HO) is attached to the piperidine ring.                                                                                                           |

|   |      |     |                    |        |                                                                                |  |
|---|------|-----|--------------------|--------|--------------------------------------------------------------------------------|--|
| 5 | 2BQ6 | IIB | 0.07 <sup>16</sup> | 522.06 | C <sub>27</sub> H <sub>28</sub> C <sub>1</sub> N <sub>5</sub> O <sub>2</sub> S |  |
| 6 | 2P16 | GG2 | 0.08 <sup>17</sup> | 459.50 | C <sub>25</sub> H <sub>25</sub> N <sub>5</sub> O <sub>4</sub>                  |  |
| 7 | 1FJS | Z34 | 0.11 <sup>18</sup> | 526.49 | C <sub>25</sub> H <sub>24</sub> F <sub>2</sub> N <sub>6</sub> O <sub>5</sub>   |  |
| 8 | 2G00 | 4QC | 0.18 <sup>19</sup> | 533.54 | C <sub>29</sub> H <sub>26</sub> F <sub>3</sub> N <sub>5</sub> O <sub>2</sub>   |  |



|    |      |     |                    |        |                                                                                 |                                                                                      |
|----|------|-----|--------------------|--------|---------------------------------------------------------------------------------|--------------------------------------------------------------------------------------|
| 9  | 1Z6E | IK8 | 0.19 <sup>20</sup> | 528.46 | C <sub>24</sub> H <sub>20</sub> F <sub>4</sub> N <sub>8</sub> O <sub>2</sub>    | 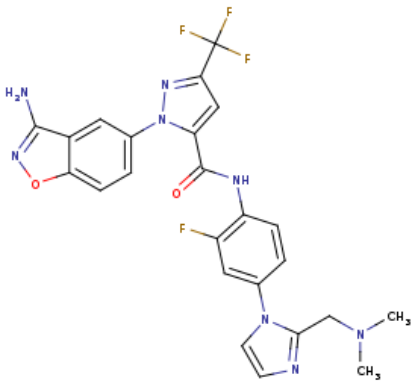   |
| 10 | 2W26 | RIV | 0.4 <sup>21</sup>  | 435.88 | C <sub>19</sub> H <sub>18</sub> C <sub>1</sub> N <sub>3</sub> O <sub>5</sub> S  |   |
| 11 | 2P95 | ME5 | 0.43 <sup>22</sup> | 441.93 | C <sub>22</sub> H <sub>20</sub> C <sub>1</sub> N <sub>3</sub> O <sub>3</sub> S  |  |
| 12 | 1MQ5 | XLC | 1 <sup>13</sup>    | 537.89 | C <sub>24</sub> H <sub>23</sub> C <sub>13</sub> N <sub>4</sub> O <sub>2</sub> S |  |

|    |      |      |                   |        |                                                                                             |  |
|----|------|------|-------------------|--------|---------------------------------------------------------------------------------------------|--|
| 13 | 2J4I | G SJ | 1 <sup>23</sup>   | 559.10 | C <sub>23</sub> H <sub>31</sub> C <sub>1</sub> N <sub>4</sub> O <sub>6</sub> S <sub>2</sub> |  |
| 14 | 2P93 | ME1  | 1.5 <sup>22</sup> | 401.87 | C <sub>19</sub> H <sub>16</sub> C <sub>1</sub> N <sub>3</sub> O <sub>3</sub> S              |  |
| 15 | 2BOH | I IA | 3 <sup>16</sup>   | 483.02 | C <sub>25</sub> H <sub>27</sub> C <sub>1</sub> N <sub>4</sub> O <sub>2</sub> S              |  |
| 16 | 2BQW | I IE | 3 <sup>16</sup>   | 452.98 | C <sub>25</sub> H <sub>29</sub> C <sub>1</sub> N <sub>4</sub> O <sub>2</sub>                |  |

|    |      |     |                  |        |                                                                                             |                                                                                      |
|----|------|-----|------------------|--------|---------------------------------------------------------------------------------------------|--------------------------------------------------------------------------------------|
| 17 | 2J95 | GSX | 4 <sup>24</sup>  | 504.04 | C <sub>19</sub> H <sub>22</sub> C <sub>1</sub> N <sub>3</sub> O <sub>5</sub> S <sub>3</sub> | 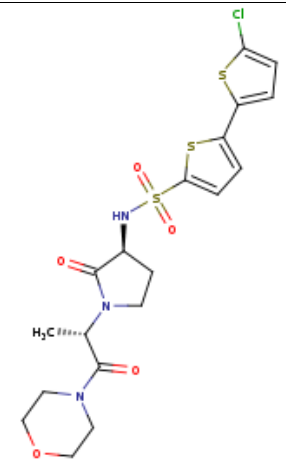  |
| 18 | 2J34 | GS6 | 15 <sup>25</sup> | 471.98 | C <sub>19</sub> H <sub>22</sub> C <sub>1</sub> N <sub>3</sub> O <sub>5</sub> S <sub>2</sub> |    |
| 19 | 1FAX | DX9 | 41 <sup>26</sup> | 444.53 | C <sub>26</sub> H <sub>28</sub> N <sub>4</sub> O <sub>3</sub>                               |  |
| 20 | 2J38 | GS5 | 47 <sup>25</sup> | 471.98 | C <sub>19</sub> H <sub>22</sub> C <sub>1</sub> N <sub>3</sub> O <sub>5</sub> S <sub>2</sub> |  |

|    |      |     |                   |        |                                                                                             |                                                                                      |
|----|------|-----|-------------------|--------|---------------------------------------------------------------------------------------------|--------------------------------------------------------------------------------------|
| 21 | 2BQ7 | IID | 89 <sup>16</sup>  | 405.53 | C <sub>25</sub> H <sub>31</sub> N <sub>3</sub> O <sub>2</sub>                               | 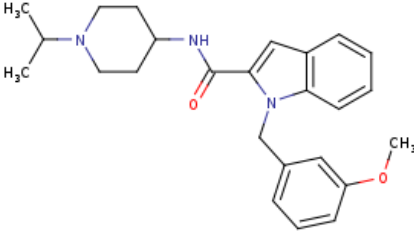   |
| 22 | 2UWP | 894 | 154 <sup>27</sup> | 449.97 | C <sub>17</sub> H <sub>24</sub> C <sub>1</sub> N <sub>3</sub> O <sub>5</sub> S <sub>2</sub> |   |
| 23 | 2J94 | G15 | 534 <sup>24</sup> | 488.97 | C <sub>17</sub> H <sub>21</sub> C <sub>1</sub> N <sub>6</sub> O <sub>5</sub> S <sub>2</sub> |  |

**Table S3** - Inhibition constant, molecular weight, chemical formula and 2D structure of 23 studied ligands of HIV-1. Their ID is given in the third column, while the second column refers to PDB ID of their complex with the HIV-1 protein.

| No. | PDB ID | Ligand ID | Inhibition constant Ki (nM) | Molecular weight (g/mol) | Chemical formular | 2D structure |
|-----|--------|-----------|-----------------------------|--------------------------|-------------------|--------------|
|-----|--------|-----------|-----------------------------|--------------------------|-------------------|--------------|

|   |      |     |                     |        |                                                               |  |
|---|------|-----|---------------------|--------|---------------------------------------------------------------|--|
| 1 | 1HVK | A79 | 0.011 <sup>28</sup> | 794.98 | C <sub>44</sub> H <sub>58</sub> N <sub>8</sub> O <sub>6</sub> |  |
| 2 | 1HVL | A76 | 0.112 <sup>28</sup> | 794.98 | C <sub>44</sub> H <sub>58</sub> N <sub>8</sub> O <sub>6</sub> |  |
| 3 | 1EBY | BEB | 0.2 <sup>29</sup>   | 652.73 | C <sub>38</sub> H <sub>40</sub> N <sub>2</sub> O <sub>8</sub> |  |

|   |      |     |                    |        |                                                               |  |
|---|------|-----|--------------------|--------|---------------------------------------------------------------|--|
| 4 | 1C6Y | MK1 | 0.31 <sup>30</sup> | 613.79 | C <sub>36</sub> H <sub>47</sub> N <sub>5</sub> O <sub>4</sub> |  |
| 5 | 2BPX | MK1 | 0.4 <sup>31</sup>  | 613.79 | C <sub>36</sub> H <sub>47</sub> N <sub>5</sub> O <sub>4</sub> |  |
| 6 | 1EC3 | MS3 | 0.92 <sup>29</sup> | 768.90 | C <sub>42</sub> H <sub>52</sub> N <sub>6</sub> O <sub>8</sub> |  |

|   |      |     |                   |        |                         |                                                                                      |
|---|------|-----|-------------------|--------|-------------------------|--------------------------------------------------------------------------------------|
| 7 | 1EC1 | BEE | 1.2 <sup>29</sup> | 778.98 | $C_{40}H_{50}N_4O_8S_2$ | 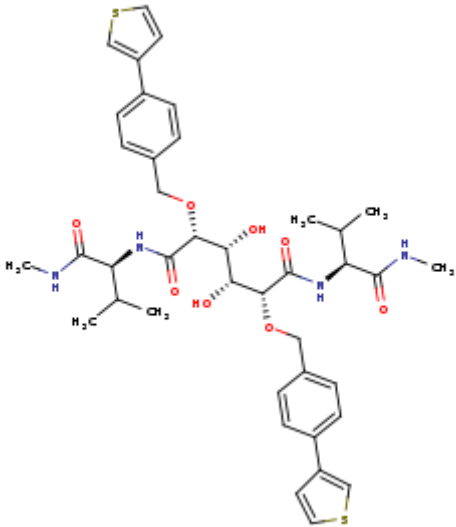   |
| 8 | 2CEJ | 1AH | 2.4 <sup>32</sup> | 681.62 | $C_{34}H_{41}BrN_4O_6$  |   |
| 9 | 2UXZ | HI1 | 3.3 <sup>33</sup> | 709.67 | $C_{36}H_{45}BrN_4O_6$  |  |

|    |      |     |                   |        |                                                                       |  |
|----|------|-----|-------------------|--------|-----------------------------------------------------------------------|--|
| 10 | 1D4J | MSC | 4.4 <sup>29</sup> | 663.13 | C <sub>36</sub> H <sub>36</sub> Cl F<br>N <sub>2</sub> O <sub>7</sub> |  |
| 11 | 2CEN | 4AH | 5 <sup>32</sup>   | 679.80 | C <sub>39</sub> H <sub>45</sub> N <sub>5</sub> O <sub>6</sub>         |  |
| 12 | 1G35 | AHF | 7.3 <sup>34</sup> | 664.76 | C <sub>35</sub> H <sub>40</sub> N <sub>2</sub> O <sub>9</sub><br>S    |  |





|    |      |     |                    |        |                                                                     |  |
|----|------|-----|--------------------|--------|---------------------------------------------------------------------|--|
| 16 | 2BPY | 3IN | 39.8 <sup>31</sup> | 727.34 | C <sub>37</sub> H <sub>55</sub> Cl N <sub>8</sub><br>O <sub>5</sub> |  |
| 17 | 2UPJ | U02 | 41 <sup>37</sup>   | 558.66 | C <sub>33</sub> H <sub>38</sub> N <sub>2</sub> O <sub>6</sub>       |  |
| 18 | 2UY0 | HV1 | 120 <sup>33</sup>  | 723.65 | C <sub>36</sub> H <sub>43</sub> Br N <sub>4</sub><br>O <sub>7</sub> |  |

|    |      |     |                   |        |                               |  |
|----|------|-----|-------------------|--------|-------------------------------|--|
| 19 | 2PWR | G4G | 260 <sup>38</sup> | 647.76 | $C_{32}H_{33}N_5O_6$<br>$S_2$ |  |
| 20 | 2PWC | G3G | 270 <sup>38</sup> | 591.74 | $C_{30}H_{33}N_5O_4$<br>$S_2$ |  |
| 21 | 1HBV | GAN | 430 <sup>39</sup> | 585.78 | $C_{32}H_{51}N_5O_5$          |  |

|    |      |     |                    |        |                                                                                 |  |
|----|------|-----|--------------------|--------|---------------------------------------------------------------------------------|--|
| 22 | 3BGB | LJG | 900 <sup>40</sup>  | 525.73 | C <sub>24</sub> H <sub>39</sub> N <sub>5</sub> O <sub>4</sub><br>S <sub>2</sub> |  |
| 23 | 3BGC | LJH | 9600 <sup>40</sup> | 593.76 | C <sub>30</sub> H <sub>35</sub> N <sub>5</sub> O <sub>4</sub><br>S <sub>2</sub> |  |

**Table S4** - Inhibition constant, molecular weight, chemical formula and 2D structure of 23 studied ligands of MCL-1. Their ID is given in the third column, while the second column refers to PDB ID of their complex with the mcl-1 protein.

| No. | PDB ID | Ligand ID | Inhibition constant Ki (nM) | Molecular weight (g/mol) | Chemical formular | 2D structure |
|-----|--------|-----------|-----------------------------|--------------------------|-------------------|--------------|
|-----|--------|-----------|-----------------------------|--------------------------|-------------------|--------------|

|   |      |     |                    |        |                                                                                  |  |
|---|------|-----|--------------------|--------|----------------------------------------------------------------------------------|--|
| 1 | 6NE5 | KJP | 0.03 <sup>41</sup> | 712.66 | C <sub>39</sub> H <sub>39</sub> Cl <sub>2</sub><br>N <sub>5</sub> O <sub>4</sub> |  |
| 2 | 6OQC | N0S | 0.04 <sup>42</sup> | 585.15 | C <sub>31</sub> H <sub>37</sub> Cl N <sub>2</sub><br>O <sub>5</sub> S            |  |
| 3 | 6OQB | N0J | 0.05 <sup>42</sup> | 599.18 | C <sub>32</sub> H <sub>39</sub> Cl N <sub>2</sub><br>O <sub>5</sub> S            |  |

|   |      |     |                     |        |                                                                                      |  |
|---|------|-----|---------------------|--------|--------------------------------------------------------------------------------------|--|
| 4 | 6UDV | Q51 | 0.051 <sup>43</sup> | 599.18 | C <sub>32</sub> H <sub>39</sub> Cl N <sub>2</sub><br>O <sub>5</sub> S                |  |
| 5 | 6UD2 | Q4D | 0.062 <sup>43</sup> | 820.38 | C <sub>40</sub> H <sub>52</sub> Cl F <sub>2</sub><br>N <sub>5</sub> O <sub>7</sub> S |  |
| 6 | 6UDI | Q4S | 0.1 <sup>43</sup>   | 715.30 | C <sub>36</sub> H <sub>47</sub> Cl N <sub>4</sub><br>O <sub>7</sub> S                |  |

|   |      |     |                    |        |                                |  |
|---|------|-----|--------------------|--------|--------------------------------|--|
| 7 | 6UDT | Q4V | 0.1 <sup>43</sup>  | 595.13 | $C_{33} H_{39} Cl N_2 O_6$     |  |
| 8 | 6OQD | N0M | 0.14 <sup>42</sup> | 587.17 | $C_{31} H_{39} Cl N_2 O_5 S$   |  |
| 9 | 5FDR | 5X3 | 0.4 <sup>44</sup>  | 659.54 | $C_{30} H_{28} Cl_2 N_4 O_7 S$ |  |

|    |      |     |                    |        |                              |  |
|----|------|-----|--------------------|--------|------------------------------|--|
| 10 | 6UDU | Q4Y | 0.5 <sup>43</sup>  | 539.06 | $C_{30} H_{35} Cl N_2 O_5$   |  |
| 11 | 6BW8 | ECM | 0.65 <sup>45</sup> | 712.66 | $C_{39} H_{39} Cl_2 N_5 O_4$ |  |
| 12 | 6B4U | CN7 | 9 <sup>46</sup>    | 548.67 | $C_{35} H_{36} N_2 O_4$      |  |



|    |      |     |                  |        |                              |  |
|----|------|-----|------------------|--------|------------------------------|--|
| 13 | 6BW2 | ECY | 21 <sup>45</sup> | 639.18 | $C_{37} H_{39} Cl N_4 O_4$   |  |
| 14 | 5IEZ | 6AL | 23 <sup>47</sup> | 619.54 | $C_{33} H_{32} Cl_2 N_4 O_4$ |  |
| 15 | 6QYP | JL5 | 46 <sup>48</sup> | 567.10 | $C_{29} H_{31} Cl N_4 O_4 S$ |  |

|    |      |     |                   |        |                         |  |
|----|------|-----|-------------------|--------|-------------------------|--|
| 16 | 6QZ8 | JL8 | 51 <sup>48</sup>  | 468.95 | $C_{24}H_{21}ClN_2O_4S$ |  |
| 17 | 4HW2 | 19H | 55 <sup>49</sup>  | 392.28 | $C_{20}H_{19}Cl_2NO_3$  |  |
| 18 | 5FC4 | 5WL | 231 <sup>44</sup> | 456.94 | $C_{23}H_{21}ClN_2O_4S$ |  |

|    |      |     |                   |        |                                                        |  |
|----|------|-----|-------------------|--------|--------------------------------------------------------|--|
| 19 | 4ZBI | 4M6 | 310 <sup>50</sup> | 385.45 | C <sub>25</sub> H <sub>23</sub> N O <sub>3</sub>       |  |
| 20 | 4HW3 | 19G | 320 <sup>49</sup> | 374.88 | C <sub>20</sub> H <sub>19</sub> Cl O <sub>3</sub><br>S |  |
| 21 | 6B4L | CJY | 340 <sup>46</sup> | 345.39 | C <sub>22</sub> H <sub>19</sub> N O <sub>3</sub>       |  |

|    |      |     |                    |        |                                                                       |                                                                                     |
|----|------|-----|--------------------|--------|-----------------------------------------------------------------------|-------------------------------------------------------------------------------------|
| 22 | 5FDO | 5X2 | 361 <sup>44</sup>  | 497.01 | C <sub>26</sub> H <sub>25</sub> Cl N <sub>2</sub><br>O <sub>4</sub> S | 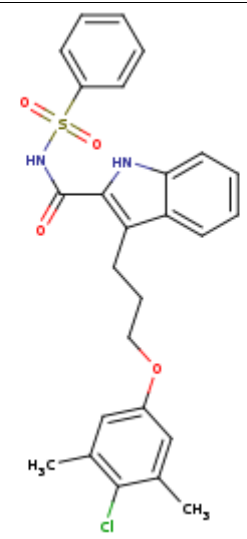 |
| 23 | 6QZB | JLK | 2400 <sup>48</sup> | 417.52 | C <sub>24</sub> H <sub>23</sub> N <sub>3</sub> O <sub>2</sub><br>S    |  |

**Table S5** - Inhibition constant, molecular weight, chemical formula and 2D structure of 23 studied ligands of CDK-2. Their ID is given in the third column, while the second column refers to PDB ID of their complex with the cdk-2 protein.

| No. | PDB ID | Ligand ID | Inhibition constant Ki (nM) | Molecular weight (g/mol) | Chemical formular | 2D structure |
|-----|--------|-----------|-----------------------------|--------------------------|-------------------|--------------|
|-----|--------|-----------|-----------------------------|--------------------------|-------------------|--------------|

|   |      |     |                  |        |                                                                                   |  |
|---|------|-----|------------------|--------|-----------------------------------------------------------------------------------|--|
| 1 | 2FVD | LIA | 3 <sup>51</sup>  | 441.45 | C <sub>18</sub> H <sub>21</sub> F <sub>2</sub> N <sub>5</sub><br>O <sub>4</sub> S |  |
| 2 | 4BCK | T3E | 4 <sup>52</sup>  | 401.47 | C <sub>16</sub> H <sub>15</sub> N <sub>7</sub><br>O <sub>2</sub> S <sub>2</sub>   |  |
| 3 | 4BCN | T9N | 12 <sup>52</sup> | 338.39 | C <sub>16</sub> H <sub>14</sub> N <sub>6</sub> O<br>S                             |  |

|   |      |     |                  |        |                                                                                 |                                                                                                                                                                                                                                                                                                                                                       |
|---|------|-----|------------------|--------|---------------------------------------------------------------------------------|-------------------------------------------------------------------------------------------------------------------------------------------------------------------------------------------------------------------------------------------------------------------------------------------------------------------------------------------------------|
| 4 | 1PF8 | SU9 | 31 <sup>53</sup> | 241.25 | C <sub>13</sub> H <sub>11</sub> N <sub>3</sub><br>O <sub>2</sub>                | 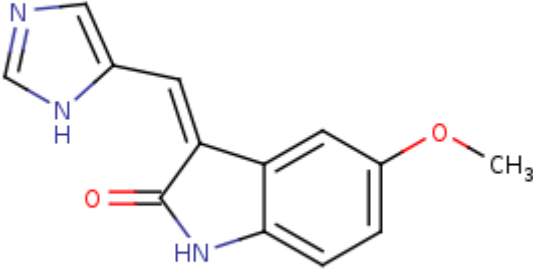 <p>Chemical structure of 1-(4-methoxyphenyl)-2-(1H-imidazol-2-yl)ethan-1-one. It features a benzimidazole core with a methoxy group (-OCH<sub>3</sub>) at the para position of the benzene ring and an imidazole ring attached to the ethyl chain.</p>             |
| 5 | 5D1J | 56H | 38 <sup>54</sup> | 380.53 | C <sub>17</sub> H <sub>24</sub> N <sub>4</sub><br>O <sub>2</sub> S <sub>2</sub> |  <p>Chemical structure of 1-(2-(2-(2,2-dimethyl-1,3-oxazol-5-yl)ethyl)thiazol-5-yl)pyrrolidine-2-one. It consists of a pyrrolidine ring connected via a carbonyl group to a thiazole ring, which is further linked to a 2,2-dimethyl-1,3-oxazole ring.</p>        |
| 6 | 1PXM | CK5 | 60 <sup>55</sup> | 298.36 | C <sub>15</sub> H <sub>14</sub> N <sub>4</sub> O<br>S                           |  <p>Chemical structure of 1-(4-hydroxyphenyl)pyrimidin-2-yl)-2,4-dimethylthiazole. It features a pyrimidine ring connected via an NH group to a 4-hydroxyphenyl ring, and a thiazole ring with two methyl groups (-CH<sub>3</sub>) at the 2 and 4 positions.</p> |

|   |      |     |                   |        |                                                                                 |  |
|---|------|-----|-------------------|--------|---------------------------------------------------------------------------------|--|
| 7 | 1PXN | CK6 | 70 <sup>55</sup>  | 313.38 | C <sub>15</sub> H <sub>15</sub> N <sub>5</sub> O<br>S                           |  |
| 8 | 4BCM | T7Z | 123 <sup>52</sup> | 485.58 | C <sub>21</sub> H <sub>23</sub> N <sub>7</sub><br>O <sub>3</sub> S <sub>2</sub> |  |
| 9 | 4BCO | T6Q | 131 <sup>52</sup> | 462.57 | C <sub>23</sub> H <sub>26</sub> N <sub>8</sub> O<br>S                           |  |

|    |      |     |                   |        |                                                                    |  |
|----|------|-----|-------------------|--------|--------------------------------------------------------------------|--|
| 10 | 4BCQ | TJF | 147 <sup>52</sup> | 435.50 | C <sub>21</sub> H <sub>21</sub> N <sub>7</sub><br>O <sub>2</sub> S |  |
| 11 | 4ACM | 7YG | 210 <sup>56</sup> | 441.51 | C <sub>20</sub> H <sub>23</sub> N <sub>7</sub><br>O <sub>3</sub> S |  |
| 12 | 1PXP | CK8 | 220 <sup>55</sup> | 325.43 | C <sub>17</sub> H <sub>19</sub> N <sub>5</sub> S                   |  |



|    |      |     |                   |        |                                                                                 |  |
|----|------|-----|-------------------|--------|---------------------------------------------------------------------------------|--|
| 13 | 1PXL | CK4 | 290 <sup>57</sup> | 350.36 | C <sub>16</sub> H <sub>13</sub> F <sub>3</sub> N <sub>4</sub><br>S              |  |
| 14 | 1PYE | PM1 | 386 <sup>58</sup> | 377.34 | C <sub>21</sub> H <sub>13</sub> F <sub>2</sub> N <sub>3</sub><br>O <sub>2</sub> |  |
| 15 | 4EOR | 4SP | 500 <sup>59</sup> | 402.47 | C <sub>18</sub> H <sub>22</sub> N <sub>6</sub><br>O <sub>3</sub> S              |  |

|    |      |     |                    |        |                                                                    |  |
|----|------|-----|--------------------|--------|--------------------------------------------------------------------|--|
| 16 | 4BCP | T3C | 568 <sup>60</sup>  | 420.53 | C <sub>21</sub> H <sub>24</sub> N <sub>8</sub> S                   |  |
| 17 | 4EOS | 1RO | 890 <sup>59</sup>  | 351.44 | C <sub>18</sub> H <sub>13</sub> N <sub>3</sub> O<br>S <sub>2</sub> |  |
| 18 | 1E1X | NW1 | 1300 <sup>61</sup> | 251.28 | C <sub>11</sub> H <sub>17</sub> N <sub>5</sub><br>O <sub>2</sub>   |  |

|    |      |     |                    |        |                                                                    |                                                                                                                                                                                                                                                                                                                                                                                                                                                |
|----|------|-----|--------------------|--------|--------------------------------------------------------------------|------------------------------------------------------------------------------------------------------------------------------------------------------------------------------------------------------------------------------------------------------------------------------------------------------------------------------------------------------------------------------------------------------------------------------------------------|
| 19 | 1JSV | U55 | 2000 <sup>62</sup> | 265.29 | C <sub>10</sub> H <sub>11</sub> N <sub>5</sub><br>O <sub>2</sub> S | 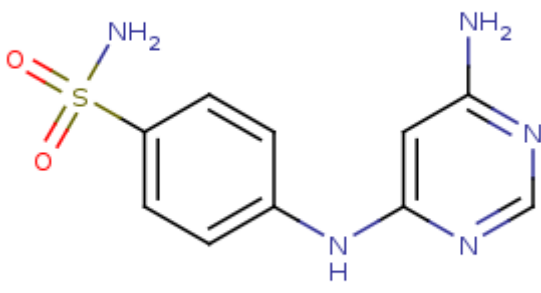 <p>The structure shows a benzene ring with a sulfonamide group (-SO<sub>2</sub>NH<sub>2</sub>) at the para position and an amino group (-NH<sub>2</sub>) at the other para position. This amino group is linked to the 4-position of a pyrimidine ring.</p>                                                                                                 |
| 20 | 1OGU | ST8 | 2400 <sup>63</sup> | 370.41 | C <sub>18</sub> H <sub>22</sub> N <sub>6</sub><br>O <sub>3</sub>   |  <p>The structure features a central pyrimidine ring with an amino group (-NH<sub>2</sub>) at the 2-position, a nitro group (-NO<sub>2</sub>) at the 4-position, and a carbonyl group (-C(=O)NH<sub>2</sub>) at the 6-position. The 5-position is linked via an oxygen atom to a cyclohexylmethyl group (-CH<sub>2</sub>-C<sub>6</sub>H<sub>11</sub>).</p> |
| 21 | 1PXJ | CK2 | 6500 <sup>57</sup> | 206.27 | C <sub>9</sub> H <sub>10</sub> N <sub>4</sub> S                    |  <p>The structure consists of a thiazole ring with methyl groups (-CH<sub>3</sub>) at the 2 and 4 positions. The 5-position of the thiazole is linked to the 2-position of a pyrimidine ring, which also has an amino group (-NH<sub>2</sub>) at the 4-position.</p>                                                                                       |

|    |      |     |                     |        |                                                                              |                                                                                     |
|----|------|-----|---------------------|--------|------------------------------------------------------------------------------|-------------------------------------------------------------------------------------|
| 22 | 1E1V | CMG | 12000 <sup>61</sup> | 247.30 | C <sub>12</sub> H <sub>17</sub> N <sub>5</sub> O                             | 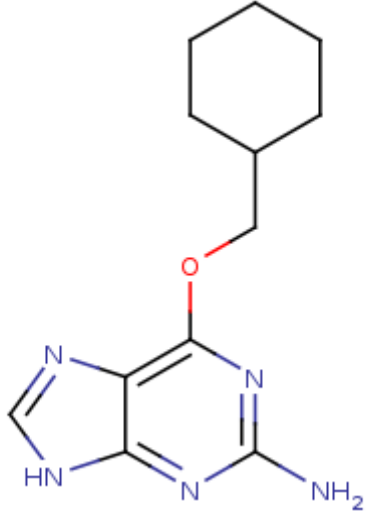 |
| 23 | 1V1K | 3FP | 35000 <sup>64</sup> | 465.44 | C <sub>22</sub> H <sub>23</sub> F <sub>4</sub> N <sub>5</sub> O <sub>2</sub> |  |

**Table S6** - Scale factor  $\beta$  for thrombin complexes.

| No. | Ligand PDB ID | Complex PDB ID | $\beta$ |
|-----|---------------|----------------|---------|
| 1   | 170           | 1SL3           | 0.50    |
| 2   | IH2           | 1C4V           | 0.43    |
| 3   | IH1           | 1C4U           | 0.43    |
| 4   | 33U           | 2ZO3           | 0.43    |
| 5   | 177           | 1TA6           | 0.43    |
| 6   | T76           | 1NT1           | 0.43    |
| 7   | BM9           | 1BMN           | 0.37    |
| 8   | MID           | 1ETS           | 0.43    |
| 9   | 894           | 2JH6           | 0.43    |
| 10  | 23U           | 3DHK           | 0.43    |
| 11  | 64U           | 3DUX           | 0.43    |
| 12  | 22U           | 2ZC9           | 0.43    |
| 13  | 29U           | 2ZGX           | 0.43    |
| 14  | 895           | 2JH5           | 0.43    |
| 15  | GR3           | 1AWH           | 0.33    |
| 16  | 00R           | 1D6W           | 0.43    |
| 17  | B01           | 3SHC           | 0.43    |

|    |     |      |      |
|----|-----|------|------|
| 18 | P97 | 3SHA | 0.43 |
| 19 | 19U | 2ZFP | 0.43 |
| 20 | 91U | 3F68 | 0.43 |
| 21 | M18 | 3EGK | 0.43 |
| 22 | 99P | 3P17 | 0.43 |
| 23 | P05 | 3SV2 | 0.43 |

**Table S7** - Scale factor  $\beta$  for factor Xa complexes

| No. | Ligand PDB ID | PDB ID | $\beta$ |
|-----|---------------|--------|---------|
| 1   | 993           | 2P3T   | 0.43    |
| 2   | XLD           | 1MQ6   | 0.43    |
| 3   | LG0           | 3CS7   | 0.43    |
| 4   | 5QC           | 2FZZ   | 0.37    |
| 5   | IIB           | 2BQ6   | 0.43    |
| 6   | GG2           | 2P16   | 0.43    |
| 7   | Z34           | 1FJS   | 0.33    |
| 8   | 4QC           | 2G00   | 0.43    |
| 9   | IK8           | 1Z6E   | 0.43    |
| 10  | RIV           | 2P95   | 0.43    |
| 11  | ME5           | 2W26   | 0.43    |
| 12  | XLC           | 1MQ5   | 0.43    |
| 13  | GSJ           | 2J4I   | 0.43    |
| 14  | ME1           | 2P93   | 0.43    |
| 15  | IIA           | 2BOH   | 0.43    |
| 16  | IIE           | 2BQW   | 0.43    |
| 17  | GSX           | 2J95   | 0.43    |
| 18  | GS6           | 2J34   | 0.43    |
| 19  | DX9           | 1FAX   | 0.37    |
| 20  | GS5           | 2J38   | 0.43    |
| 21  | IID           | 2BQ7   | 0.43    |
| 22  | 894           | 2UWP   | 0.43    |
| 23  | G15           | 2J94   | 0.43    |

**Table S8** - Scale factor  $\beta$  for beta-lactamase complexes

| No. | Ligand PDB ID | PDB ID | $\beta$ |
|-----|---------------|--------|---------|
| 1   | HTC           | 1XGJ   | 0.33    |
| 2   | 23C           | 2R9W   | 0.33    |
| 3   | NST           | 1XGI   | 0.37    |
| 4   | WH6           | 2R9X   | 0.33    |
| 5   | 18U           | 4JXS   | 0.33    |
| 6   | 1MW           | 4JXW   | 0.33    |
| 7   | STC           | 1L2S   | 0.37    |
| 8   | 1MU           | 4JXV   | 0.33    |
| 9   | DK2           | 2PU2   | 0.33    |
| 10  | 4A1           | 4KZ4   | 0.37    |
| 11  | NZ9           | 4KZA   | 0.37    |
| 12  | ZB6           | 4KZ6   | 0.37    |
| 13  | G14           | 3GRJ   | 0.37    |
| 14  | 1U1           | 4KZ3   | 0.43    |
| 15  | 1U6           | 4KZ8   | 0.37    |
| 16  | GF1           | 3GSG   | 0.37    |

|    |     |      |      |
|----|-----|------|------|
| 17 | GF4 | 3GR2 | 0.33 |
| 18 | 3GV | 3GVB | 0.37 |
| 19 | 1U5 | 4KZ7 | 0.37 |
| 20 | F12 | 2HDU | 0.37 |
| 21 | GV9 | 3GV9 | 0.37 |
| 22 | 1U3 | 4KZ5 | 0.37 |
| 23 | 4A3 | 2HDR | 0.33 |

**Table S9** - Scale factor  $\beta$  for HIV-1 complexes

| No. | Ligand PDB ID | PDB ID | $\beta$ |
|-----|---------------|--------|---------|
| 1   | A79           | 1HVK   | 0.33    |
| 2   | A76           | 1HVL   | 0.33    |
| 3   | BEB           | 1EBY   | 0.33    |
| 4   | MK1           | 1C6Y   | 0.33    |
| 5   | MK1           | 2BPX   | 0.33    |
| 6   | MS3           | 1EC3   | 0.33    |
| 7   | BEE           | 1EC1   | 0.33    |
| 8   | 1AH           | 2CEJ   | 0.33    |
| 9   | HI1           | 2UXZ   | 0.33    |
| 10  | MSC           | 1D4J   | 0.33    |
| 11  | 4AH           | 2CEN   | 0.33    |
| 12  | AHF           | 1G35   | 0.33    |
| 13  | A1A           | 2BQV   | 0.33    |
| 14  | IM1           | 1SBG   | 0.37    |
| 15  | 1IN           | 2BPV   | 0.33    |
| 16  | 3IN           | 2BPY   | 0.33    |
| 17  | U02           | 2UPJ   | 0.37    |
| 18  | HV1           | 2UY0   | 0.33    |
| 19  | G4G           | 2PWR   | 0.43    |
| 20  | G3G           | 2PWC   | 0.43    |
| 21  | GAN           | 1HBV   | 0.43    |
| 22  | LJG           | 3BGB   | 0.43    |
| 23  | LJH           | 3BGC   | 0.43    |

**Table S10** - Scale factor  $\beta$  for mcl-1 complexes

| No. | Ligand PDB ID | PDB ID | $\beta$ |
|-----|---------------|--------|---------|
| 1   | KJP           | 6NE5   | 0.37    |
| 2   | N0S           | 6OQC   | 0.37    |
| 3   | N0J           | 6OQB   | 0.37    |
| 4   | Q51           | 6UDV   | 0.37    |
| 5   | Q4D           | 6UD2   | 0.37    |
| 6   | Q4S           | 6UDI   | 0.37    |
| 7   | Q4V           | 6UDT   | 0.33    |
| 8   | N0M           | 6OQD   | 0.37    |
| 9   | 5X3           | 5FDR   | 0.37    |

|    |     |      |      |
|----|-----|------|------|
| 10 | Q4Y | 6UDU | 0.33 |
| 11 | ECM | 6BW8 | 0.37 |
| 12 | CN7 | 6B4U | 0.37 |
| 13 | ECY | 6BW2 | 0.37 |
| 14 | 6AL | 5IEZ | 0.37 |
| 15 | JL5 | 6QYP | 0.33 |
| 16 | JL8 | 6QZ8 | 0.33 |
| 17 | 19H | 4HW2 | 0.37 |
| 18 | 5WL | 5FC4 | 0.43 |
| 19 | 4M6 | 4ZBI | 0.37 |
| 20 | 19G | 4HW3 | 0.37 |
| 21 | CJY | 6B4L | 0.37 |
| 22 | 5X2 | 5FDO | 0.43 |
| 23 | JLK | 6QZB | 0.37 |

**Table S11** - Scale factor  $\beta$  for CDK-2 complexes

| No. | Ligand PDB ID | PDB ID | $\beta$ |
|-----|---------------|--------|---------|
| 1   | LIA           | 2FVD   | 0.43    |
| 2   | T3E           | 4BCK   | 0.43    |
| 3   | T9N           | 4BCN   | 0.37    |
| 4   | SU9           | 1PF8   | 0.43    |
| 5   | 56H           | 5D1J   | 0.43    |
| 6   | CK5           | 1PXM   | 0.37    |
| 7   | CK6           | 1PXN   | 0.37    |
| 8   | T7Z           | 4BCM   | 0.43    |
| 9   | T6Q           | 4BCO   | 0.43    |
| 10  | TJF           | 4BCQ   | 0.43    |
| 11  | 7YG           | 4ACM   | 0.43    |
| 12  | CK8           | 1XPX   | 0.43    |
| 13  | CK4           | 1PXL   | 0.43    |
| 14  | PM1           | 1PYE   | 0.43    |
| 15  | 4SP           | 4EOR   | 0.43    |
| 16  | T3C           | 4BCP   | 0.43    |
| 17  | 1RO           | 4EOS   | 0.43    |
| 18  | NW1           | 1E1X   | 0.43    |
| 19  | U55           | 1JSV   | 0.43    |
| 20  | ST8           | 1OGU   | 0.43    |
| 21  | CK2           | 1PXJ   | 0.43    |
| 22  | CMG           | 1E1V   | 0.43    |
| 23  | 3FP           | 1V1K   | 0.37    |

**Table S12.** SMD results obtained for 23 factor Xa complexes.  $\Delta G_{neq}^{Jar}$ ,  $\Delta G_{unbind}^{\ddagger}$ , and  $\Delta G_{bind}^{\ddagger}$  were obtained using the Jarzynski's equality.

| No. | Ligand | Complex | $\Delta G_{exp}$ | $F_{max}$ | $W_{pull}$ | $\Delta G_{neq}^{Jar}$ | $t_{max}$ | $\Delta G_{unbind}^{\ddagger}$ | $\Delta G_{bind}^{\ddagger}$ |
|-----|--------|---------|------------------|-----------|------------|------------------------|-----------|--------------------------------|------------------------------|
|-----|--------|---------|------------------|-----------|------------|------------------------|-----------|--------------------------------|------------------------------|



|    | PDB ID | PDB ID | (kcal/mol) | (pN)       | (kcal/mol) | (kcal/mol)  | (ps)     | (kcal/mol)   | (kcal/mol)   |
|----|--------|--------|------------|------------|------------|-------------|----------|--------------|--------------|
| 1  | 993    | 2P3T   | -15.5      | 1057 ± 38  | 115 ± 9    | -95.0 ± 1.9 | 231 ± 12 | 73.6 ± 8.1   | 188.7 ± 14.0 |
| 2  | XLD    | 1MQ6   | -15.3      | 1199 ± 101 | 140 ± 17   | -90.5 ± 1.9 | 250 ± 20 | 101.4 ± 18.2 | 240.7 ± 34.4 |
| 3  | LG0    | 3CS7   | -14.6      | 1108 ± 86  | 115 ± 11   | -96.0 ± 1.9 | 232 ± 18 | 86.6 ± 14.5  | 200.7 ± 24.4 |
| 4  | 5QC    | 2FZZ   | -14.4      | 1038 ± 106 | 117 ± 14   | -83.4 ± 1.9 | 223 ± 17 | 71.9 ± 18.4  | 188.4 ± 31.0 |
| 5  | IIB    | 2BQ6   | -13.9      | 928 ± 93   | 97 ± 12    | -76.3 ± 1.9 | 191 ± 20 | 62.0 ± 12.0  | 158.3 ± 22.5 |
| 6  | GG2    | 2P16   | -13.8      | 1150 ± 132 | 126 ± 19   | -84.0 ± 1.9 | 237 ± 27 | 95.5 ± 20.7  | 221.0 ± 38.6 |
| 7  | Z34    | 1FJS   | -13.7      | 1132 ± 89  | 124 ± 14   | -87.8 ± 1.9 | 240 ± 18 | 86.4 ± 16.6  | 210.3 ± 28.1 |
| 8  | 4QC    | 2G00   | -13.4      | 1056 ± 118 | 119 ± 18   | -92.1 ± 1.8 | 217 ± 27 | 79.0 ± 17.6  | 197.6 ± 35.4 |
| 9  | IK8    | 1Z6E   | -13.3      | 990 ± 117  | 107 ± 14   | -88.8 ± 1.7 | 213 ± 24 | 67.3 ± 19.0  | 174.1 ± 31.0 |
| 10 | RIV    | 2W26   | -12.9      | 1079 ± 80  | 124 ± 16   | -80.2 ± 1.9 | 230 ± 22 | 78.9 ± 13.2  | 202.7 ± 24.5 |
| 11 | ME5    | 2P95   | -12.8      | 864 ± 31   | 82 ± 5     | -72.0 ± 1.9 | 188 ± 7  | 51.3 ± 5.5   | 132.5 ± 6.8  |
| 12 | XLC    | 1MQ5   | -12.4      | 911 ± 80   | 97 ± 9     | -76.9 ± 1.9 | 197 ± 19 | 55.7 ± 12.2  | 152.2 ± 18.7 |
| 13 | GSJ    | 2J4I   | -12.4      | 1028 ± 133 | 120 ± 16   | -86.1 ± 1.9 | 227 ± 26 | 68.5 ± 21.6  | 187.8 ± 37.3 |
| 14 | ME1    | 2P93   | -12.1      | 844 ± 74   | 80 ± 6     | -70.6 ± 1.7 | 176 ± 16 | 50.9 ± 9.1   | 130.5 ± 13.8 |
| 15 | IIA    | 2BOH   | -11.7      | 911 ± 50   | 91 ± 5     | -77.9 ± 1.9 | 187 ± 10 | 59.7 ± 7.4   | 150.2 ± 10.8 |
| 16 | IIE    | 2BQW   | -11.7      | 1067 ± 112 | 111 ± 17   | -82.3 ± 1.9 | 217 ± 22 | 82.4 ± 18.3  | 192.8 ± 35.6 |
| 17 | GSX    | 2J95   | -11.5      | 816 ± 56   | 82 ± 6     | -72.7 ± 1.7 | 172 ± 14 | 47.2 ± 7.0   | 129.1 ± 12.0 |
| 18 | GS6    | 2J34   | -10.7      | 782 ± 68   | 80 ± 6     | -67.5 ± 1.9 | 166 ± 11 | 42.7 ± 10.2  | 122.0 ± 14.9 |
| 19 | DX9    | 1FAX   | -10.1      | 868 ± 77   | 98 ± 9     | -78.3 ± 1.9 | 193 ± 18 | 48.5 ± 14.9  | 145.9 ± 18.3 |
| 20 | GS5    | 2J38   | -10.0      | 767 ± 66   | 73 ± 7     | -62.1 ± 1.8 | 168 ± 12 | 39.2 ± 9.6   | 112.0 ± 15.5 |
| 21 | IID    | 2BQ7   | -9.7       | 960 ± 125  | 92 ± 16    | -66.2 ± 1.9 | 194 ± 28 | 67.7 ± 18.1  | 159.2 ± 34.0 |
| 22 | 894    | 2UWP   | -9.4       | 822 ± 74   | 88 ± 9     | -70.3 ± 1.8 | 182 ± 20 | 43.4 ± 13.4  | 130.7 ± 16.6 |
| 23 | G15    | 2J94   | -8.6       | 695 ± 51   | 71 ± 5     | -62.8 ± 1.9 | 174 ± 12 | 27.3 ± 7.5   | 98.2 ± 10.7  |

**Table S13.** SMD results obtained for 23 HIV-1 complexes.  $\Delta G_{neq}^{Jar}$ ,  $\Delta G_{unbind}^{\ddagger}$ , and  $\Delta G_{bind}^{\ddagger}$  were obtained using the Jarzynski's equality.

| No. | Ligand PDB ID | Complex PDB ID | $\Delta G_{exp}$ (kcal/mol) | $F_{max}$ (pN) | $W_{pull}$ (kcal/mol) | $\Delta G_{neq}^{Jar}$ (kcal/mol) | $t_{max}$ (ps) | $\Delta G_{unbind}^{\ddagger}$ (kcal/mol) | $\Delta G_{bind}^{\ddagger}$ (kcal/mol) |
|-----|---------------|----------------|-----------------------------|----------------|-----------------------|-----------------------------------|----------------|-------------------------------------------|-----------------------------------------|
| 1   | A79           | 1HVK           | -15.04                      | 1984 ± 229     | 359 ± 58              | -280.2 ± 1.9                      | 423 ± 44       | 272.7 ± 69.7                              | 631.6 ± 127.3                           |
| 2   | A76           | 1HVL           | -13.66                      | 2065 ± 255     | 392 ± 71              | -260.6 ± 1.9                      | 446 ± 50       | 293.0 ± 80.6                              | 684.9 ± 151.6                           |
| 3   | BEB           | 1EBY           | -13.31                      | 1782 ± 221     | 321 ± 52              | -236.7 ± 1.9                      | 397 ± 46       | 214.2 ± 62.0                              | 534.6 ± 113.8                           |
| 4   | MK1           | 1C6Y           | -13.05                      | 1620 ± 248     | 281 ± 51              | -183.4 ± 2.0                      | 366 ± 45       | 174.4 ± 63.1                              | 455.0 ± 114.0                           |
| 5   | MK1           | 2BPX           | -12.9                       | 1989 ± 240     | 386 ± 74              | -250.3 ± 2.0                      | 441 ± 58       | 259.4 ± 71.1                              | 645.3 ± 144.8                           |
| 6   | MS3           | 1EC3           | -12.4                       | 2244 ± 325     | 444 ± 102             | -247.2 ± 2.0                      | 470 ± 67       | 360.8 ± 106.0                             | 804.1 ± 208.2                           |
| 7   | BEE           | 1EC1           | -12.24                      | 1695 ± 217     | 302 ± 51              | -206.1 ± 1.9                      | 389 ± 49       | 183.9 ± 57.6                              | 485.2 ± 108.8                           |
| 8   | 1AH           | 2CEJ           | -11.83                      | 2011 ± 288     | 361 ± 78              | -208.2 ± 2.0                      | 432 ± 61       | 280.1 ± 83.2                              | 640.6 ± 161.7                           |
| 9   | HII           | 2UXZ           | -11.64                      | 1939 ± 174     | 337 ± 44              | -243.0 ± 2.0                      | 415 ± 35       | 258.0 ± 50.8                              | 595.0 ± 95.3                            |

|    |     |      |        |            |          |              |          |              |               |
|----|-----|------|--------|------------|----------|--------------|----------|--------------|---------------|
| 10 | MSC | 1D4J | -11.47 | 2082 ± 237 | 382 ± 66 | -250.2 ± 2.0 | 442 ± 49 | 301.7 ± 66.8 | 683.6 ± 132.4 |
| 11 | 4AH | 2CEN | -11.39 | 1838 ± 252 | 323 ± 63 | -195.1 ± 2.0 | 401 ± 56 | 230.9 ± 61.7 | 554.0 ± 124.5 |
| 12 | AHF | 1G35 | -11.17 | 2090 ± 245 | 382 ± 72 | -214.1 ± 2.0 | 451 ± 48 | 300.9 ± 74.2 | 682.0 ± 146.0 |
| 13 | A1A | 2BQV | -11.04 | 2037 ± 233 | 362 ± 61 | -239.2 ± 2.0 | 433 ± 48 | 289.2 ± 69.0 | 650.8 ± 130.2 |
| 14 | IM1 | 1SBG | -10.63 | 1485 ± 198 | 242 ± 34 | -168.7 ± 2.0 | 325 ± 42 | 152.0 ± 41.2 | 393.6 ± 75.1  |
| 15 | 1IN | 2BPV | -10.53 | 1713 ± 274 | 285 ± 64 | -188.3 ± 2.0 | 373 ± 55 | 203.2 ± 67.8 | 487.9 ± 132.0 |
| 16 | 3IN | 2BPY | -10.16 | 1532 ± 203 | 253 ± 37 | -163.9 ± 2.0 | 337 ± 44 | 160.8 ± 42.2 | 413.4 ± 79.4  |
| 17 | U02 | 2UPJ | -10.14 | 1394 ± 221 | 212 ± 44 | -127.2 ± 2.0 | 322 ± 52 | 126.0 ± 41.3 | 337.8 ± 85.4  |
| 18 | HV1 | 2UY0 | -9.5   | 1942 ± 232 | 344 ± 54 | -231.2 ± 1.9 | 418 ± 46 | 260.4 ± 66.1 | 603.7 ± 120.4 |
| 19 | G4G | 2PWR | -9.04  | 1613 ± 262 | 253 ± 54 | -146.2 ± 2.0 | 348 ± 54 | 182.0 ± 60.1 | 434.5 ± 113.8 |
| 20 | G3G | 2PWC | -9.02  | 1425 ± 188 | 213 ± 38 | -134.3 ± 2.0 | 310 ± 44 | 143.6 ± 41.4 | 356.1 ± 79.6  |
| 21 | GAN | 1HBV | -8.74  | 1712 ± 328 | 291 ± 77 | -125.7 ± 2.0 | 372 ± 71 | 209.4 ± 77.6 | 500.0 ± 154.3 |
| 22 | LJG | 3BGB | -8.3   | 1354 ± 200 | 206 ± 32 | -146.3 ± 2.0 | 290 ± 45 | 130.2 ± 38.6 | 335.6 ± 70.3  |
| 23 | LJH | 3BGC | -6.89  | 1300 ± 211 | 207 ± 35 | -130.0 ± 1.9 | 294 ± 43 | 113.5 ± 37.5 | 319.8 ± 72.8  |

**Table S14.** SMD results obtained for 23 MCL-1 complexes.  $\Delta G_{neq}^{Jar}$ ,  $\Delta G_{unbind}^{\ddagger}$ , and  $\Delta G_{bind}^{\ddagger}$  were obtained using the Jarzynski's equality.

| No. | Ligand PDB ID | Complex PDB ID | $\Delta G_{exp}$ (kcal/mol) | $F_{max}$ (pN) | $W_{pull}$ (kcal/mol) | $\Delta G_{neq}^{Jar}$ (kcal/mol) | $t_{max}$ (ps) | $\Delta G_{unbind}^{\ddagger}$ (kcal/mol) | $\Delta G_{bind}^{\ddagger}$ (kcal/mol) |
|-----|---------------|----------------|-----------------------------|----------------|-----------------------|-----------------------------------|----------------|-------------------------------------------|-----------------------------------------|
| 1   | KJP           | 6NE5           | -14.44                      | 1088 ± 111     | 120 ± 18              | -81.7 ± 1.9                       | 246 ± 24       | 77.7 ± 16.6                               | 197.2 ± 34.3                            |
| 2   | N0S           | 6OQC           | -14.27                      | 1239 ± 147     | 135 ± 26              | -84.8 ± 2.0                       | 257 ± 32       | 111.5 ± 25.4                              | 246.6 ± 51.6                            |
| 3   | N0J           | 6OQB           | -14.14                      | 1135 ± 100     | 119 ± 15              | -77.8 ± 2.0                       | 241 ± 21       | 90.6 ± 17.6                               | 209.4 ± 32.5                            |
| 4   | Q51           | 6UDV           | -14.13                      | 1126 ± 106     | 118 ± 16              | -76.0 ± 1.9                       | 243 ± 22       | 88.0 ± 16.8                               | 205.7 ± 32.5                            |
| 5   | Q4D           | 6UD2           | -14.01                      | 1397 ± 155     | 180 ± 33              | -79.9 ± 2.0                       | 304 ± 35       | 130.5 ± 27.5                              | 309.7 ± 60.4                            |
| 6   | Q4S           | 6UDI           | -13.73                      | 1408 ± 134     | 171 ± 28              | -88.0 ± 2.0                       | 299 ± 29       | 138.8 ± 26.3                              | 309.3 ± 53.8                            |
| 7   | Q4V           | 6UDT           | -13.73                      | 1093 ± 214     | 116 ± 33              | -61.8 ± 2.0                       | 234 ± 45       | 86.7 ± 32.5                               | 202.9 ± 65.3                            |
| 8   | N0M           | 6OQD           | -13.53                      | 999 ± 117      | 104 ± 16              | -68.4 ± 2.0                       | 214 ± 26       | 69.8 ± 17.4                               | 173.4 ± 33.6                            |
| 9   | 5X3           | 5FDR           | -12.9                       | 756 ± 90       | 73 ± 8                | -57.4 ± 1.8                       | 165 ± 19       | 40.3 ± 9.6                                | 112.6 ± 17.6                            |
| 10  | Q4Y           | 6UDU           | -12.77                      | 1452 ± 152     | 174 ± 31              | -95.1 ± 2.0                       | 302 ± 31       | 151.5 ± 31.3                              | 325.3 ± 62.8                            |
| 11  | ECM           | 6BW8           | -12.61                      | 1108 ± 109     | 121 ± 20              | -91.2 ± 1.8                       | 237 ± 24       | 85.3 ± 16.3                               | 205.7 ± 35.9                            |
| 12  | CN7           | 6B4U           | -11.04                      | 728 ± 97       | 67 ± 8                | -52.1 ± 1.9                       | 158 ± 21       | 38.8 ± 11.0                               | 105.7 ± 18.8                            |
| 13  | ECY           | 6BW2           | -10.54                      | 761 ± 142      | 77 ± 13               | -46.6 ± 1.8                       | 164 ± 30       | 42.1 ± 14.5                               | 118.8 ± 27.5                            |
| 14  | 6AL           | 5IEZ           | -10.48                      | 731 ± 73       | 74 ± 7                | -58.4 ± 2.0                       | 163 ± 16       | 37.6 ± 8.0                                | 110.8 ± 15.2                            |
| 15  | JL5           | 6QYP           | -10.07                      | 712 ± 77       | 62 ± 8                | -40.3 ± 2.0                       | 152 ± 16       | 36.8 ± 7.9                                | 98.1 ± 16.5                             |
| 16  | JL8           | 6QZ8           | -10.01                      | 760 ± 87       | 62 ± 8                | -45.3 ± 1.9                       | 158 ± 20       | 43.3 ± 9.5                                | 105.4 ± 18.1                            |
| 17  | 19H           | 4HW2           | -9.96                       | 833 ± 94       | 78 ± 12               | -46.5 ± 2.0                       | 181 ± 21       | 49.3 ± 10.5                               | 127.5 ± 22.2                            |
| 18  | 5WL           | 5FC4           | -9.11                       | 537 ± 58       | 50 ± 7                | -34.0 ± 2.0                       | 125 ± 19       | 21.3 ± 4.8                                | 71.0 ± 12.1                             |
| 19  | 4M6           | 4ZBI           | -8.93                       | 800 ± 107      | 75 ± 10               | -55.1 ± 1.9                       | 173 ± 22       | 46.5 ± 11.5                               | 121.1 ± 21.2                            |
| 20  | 19G           | 4HW3           | -8.91                       | 815 ± 124      | 76 ± 13               | -49.2 ± 1.9                       | 178 ± 28       | 47.5 ± 13.9                               | 123.3 ± 27.2                            |
| 21  | CJY           | 6B4L           | -8.88                       | 773 ± 93       | 67 ± 11               | -43.8 ± 2.0                       | 165 ± 24       | 43.2 ± 9.0                                | 110.0 ± 20.2                            |
| 22  | 5X2           | 5FDO           | -8.84                       | 798 ± 110      | 76 ± 10               | -57.2 ± 1.9                       | 171 ± 25       | 45.3 ± 12.4                               | 120.6 ± 22.0                            |
| 23  | JLK           | 6QZB           | -7.71                       | 613 ± 82       | 48 ± 7                | -26.9 ± 2.0                       | 131 ± 18       | 27.8 ± 7.5                                | 75.0 ± 14.6                             |

**Table S15.** SMD results obtained for 23 CDK-2 complexes.  $\Delta G_{neq}^{Jar}$ ,  $\Delta G_{unbind}^{\ddagger}$ , and  $\Delta G_{bind}^{\ddagger}$  were obtained using the Jarzynski's equality.

| No. | Ligand PDB ID | Complex PDB ID | $\Delta G_{exp}$ (kcal/mol) | $F_{max}$ (pN) | $W_{pull}$ (kcal/mol) | $\Delta G_{neq}^{Jar}$ (kcal/mol) | $t_{max}$ (ps) | $\Delta G_{unbind}^{\ddagger}$ (kcal/mol) | $\Delta G_{bind}^{\ddagger}$ (kcal/mol) |
|-----|---------------|----------------|-----------------------------|----------------|-----------------------|-----------------------------------|----------------|-------------------------------------------|-----------------------------------------|
| 1   | LIA           | 2FVD           | -11.7                       | 1602 ± 230     | 230 ± 43              | -153.0 ± 1.9                      | 334 ± 44       | 194.0 ± 48.4                              | 423.9 ± 107.7                           |
| 2   | T3E           | 4BCK           | -11.53                      | 1346 ± 207     | 200 ± 30              | -159.8 ± 1.9                      | 296 ± 42       | 149.9 ± 34.0                              | 312.7 ± 70.2                            |
| 3   | T9N           | 4BCN           | -10.87                      | 1492 ± 124     | 226 ± 18              | -154.6 ± 1.9                      | 330 ± 31       | 151.7 ± 27.6                              | 376.8 ± 39.0                            |
| 4   | SU9           | 1PF8           | -10.31                      | 1285 ± 114     | 156 ± 28              | -118.7 ± 1.9                      | 281 ± 26       | 113.2 ± 21.8                              | 264.6 ± 42.1                            |
| 5   | 56H           | 5D1J           | -10.18                      | 1611 ± 131     | 219 ± 27              | -158.7 ± 1.9                      | 344 ± 27       | 173.5 ± 22.7                              | 403.3 ± 53.5                            |
| 6   | CK5           | 1PXM           | -9.91                       | 999 ± 191      | 139 ± 51              | -103.9 ± 1.8                      | 220 ± 41       | 88.2 ± 22.1                               | 226.9 ± 52.4                            |
| 7   | CK6           | 1PXN           | -9.82                       | 1630 ± 236     | 219 ± 57              | -125.8 ± 2.0                      | 344 ± 48       | 185.5 ± 52.9                              | 409.8 ± 99.6                            |
| 8   | T7Z           | 4BCM           | -9.48                       | 1212 ± 94      | 191 ± 25              | -145.5 ± 1.8                      | 300 ± 47       | 91.2 ± 18.1                               | 279.1 ± 36.9                            |
| 9   | T6Q           | 4BCO           | -9.45                       | 1394 ± 143     | 186 ± 26              | -138.2 ± 1.9                      | 303 ± 27       | 128.4 ± 25.8                              | 324.8 ± 59.1                            |
| 10  | TJF           | 4BCQ           | -9.38                       | 1214 ± 152     | 153 ± 29              | -90.0 ± 1.9                       | 267 ± 31       | 101.7 ± 27.6                              | 254.1 ± 53.5                            |
| 11  | 7YG           | 4ACM           | -9.17                       | 1176 ± 192     | 178 ± 28              | -120.5 ± 1.9                      | 275 ± 47       | 92.7 ± 25.5                               | 269.9 ± 49.2                            |
| 12  | CK8           | 1PXP           | -9.14                       | 1062 ± 237     | 140 ± 27              | -97.0 ± 1.9                       | 233 ± 48       | 96.5 ± 35.2                               | 235.6 ± 60.3                            |
| 13  | CK4           | 1PXL           | -8.97                       | 1210 ± 164     | 144 ± 24              | -102.1 ± 1.9                      | 260 ± 32       | 105.4 ± 29.7                              | 246.5 ± 46.0                            |
| 14  | PM1           | 1PYE           | -8.8                        | 990 ± 111      | 130 ± 21              | -80.7 ± 1.9                       | 220 ± 32       | 69.6 ± 15.4                               | 198.6 ± 30.8                            |
| 15  | 4SP           | 4EOR           | -8.65                       | 1372 ± 124     | 177 ± 24              | -111.3 ± 1.9                      | 305 ± 26       | 123.7 ± 24.5                              | 300.3 ± 47.2                            |
| 16  | T3C           | 4BCP           | -8.57                       | 1458 ± 267     | 192 ± 34              | -122.5 ± 1.9                      | 311 ± 54       | 134.5 ± 40.0                              | 360.8 ± 101.4                           |
| 17  | 1RO           | 4EOS           | -8.3                        | 1239 ± 236     | 168 ± 44              | -95.7 ± 1.9                       | 285 ± 44       | 110.9 ± 43.1                              | 276.6 ± 92.4                            |
| 18  | NW1           | 1E1X           | -8.08                       | 1084 ± 177     | 128 ± 28              | -73.9 ± 1.9                       | 244 ± 43       | 82.1 ± 23.9                               | 201.2 ± 50.4                            |
| 19  | U55           | 1JSV           | -7.82                       | 1061 ± 234     | 131 ± 33              | -90.2 ± 1.9                       | 231 ± 41       | 96.0 ± 42.7                               | 206.5 ± 73.6                            |
| 20  | ST8           | 1OGU           | -7.71                       | 1106 ± 171     | 123 ± 27              | -78.6 ± 1.9                       | 241 ± 34       | 87.7 ± 27.6                               | 210.0 ± 53.9                            |
| 21  | CK2           | 1PXJ           | -7.12                       | 1207 ± 161     | 152 ± 41              | -99.8 ± 1.9                       | 260 ± 34       | 117.7 ± 40.3                              | 261.2 ± 70.4                            |
| 22  | CMG           | 1E1V           | -6.75                       | 926 ± 191      | 128 ± 24              | -75.8 ± 1.9                       | 235 ± 52       | 84.1 ± 28.8                               | 208.1 ± 45.8                            |
| 23  | 3FP           | 1V1K           | -6.12                       | 946 ± 136      | 122 ± 19              | -74.8 ± 1.9                       | 227 ± 30       | 56.8 ± 17.0                               | 174.9 ± 35.0                            |

**Table S16** - Average polar and non-polar interaction energy in the bound and free state for 23 factor Xa complexes. Absolute binding free energy  $\Delta G_{LIE}$  was obtained for  $\alpha=1$  (optimal value for a set of 23 compounds).

| No. | Factor Xa PDB ID | $\Delta G_{exp}$ | $\langle V^{elec} \rangle_{bound}$ | $\langle V^{elec} \rangle_{free}$ | $\langle V^{vdw} \rangle_{bound}$ | $\langle V^{vdw} \rangle_{free}$ | $\Delta G_{LIE}$<br>$\alpha = 1$ |
|-----|------------------|------------------|------------------------------------|-----------------------------------|-----------------------------------|----------------------------------|----------------------------------|
| 1   | 2P3T             | -15.5            | -43.1 ± 4.7                        | -37.1 ± 3                         | -118.9 ± 5.8                      | -37.1 ± 3.1                      | -84.4 ± 12.3                     |
| 2   | 1MQ6             | -15.3            | -41.7 ± 3.1                        | -31.3 ± 2.6                       | -135.4 ± 5.1                      | -35 ± 2.9                        | -104.8 ± 10.4                    |
| 3   | 3CS7             | -14.6            | -20.9 ± 2.1                        | -16.4 ± 1.6                       | -121.8 ± 5.5                      | -41.4 ± 2.5                      | -82.3 ± 9.6                      |
| 4   | 2FZZ             | -14.4            | -38.6 ± 3.8                        | -29.6 ± 2.6                       | -121.2 ± 6.8                      | -40.7 ± 3.4                      | -83.8 ± 12.6                     |
| 5   | 2BQ6             | -13.9            | -25 ± 2.9                          | -20.1 ± 2.3                       | -119.6 ± 3.9                      | -38.6 ± 2.6                      | -83.1 ± 8.7                      |
| 6   | 2P16             | -13.8            | -30.8 ± 4.1                        | -27.9 ± 3                         | -111 ± 5.3                        | -34.8 ± 3.2                      | -77.4 ± 11.5                     |
| 7   | 1FJS             | -13.7            | -50.4 ± 5.5                        | -49.1 ± 3.4                       | -104.5 ± 4.5                      | -27.7 ± 4.2                      | -77.2 ± 11.6                     |
| 8   | 2G00             | -13.4            | -29.3 ± 2.8                        | -26.6 ± 2.6                       | -114.2 ± 5.4                      | -38.4 ± 3.1                      | -76.9 ± 10.9                     |
| 9   | 1Z6E             | -13.3            | -41.7 ± 5                          | -30.7 ± 2.9                       | -113.4 ± 4.4                      | -36 ± 3.1                        | -82.1 ± 10.9                     |
| 10  | 2W26             | -12.9            | -31.5 ± 3.1                        | -24.4 ± 2.5                       | -106.6 ± 3.4                      | -33.2 ± 2.5                      | -76.4 ± 8.3                      |
| 11  | 2P95             | -12.8            | -28.5 ± 2.5                        | -25.6 ± 2.3                       | -101.8 ± 3.3                      | -32.8 ± 2.7                      | -70.3 ± 7.9                      |
| 12  | 1MQ5             | -12.4            | -33.8 ± 3.5                        | -22.9 ± 2.2                       | -117.4 ± 6.4                      | -36 ± 2.8                        | -86 ± 11.6                       |
| 13  | 2J4I             | -12.4            | -53.4 ± 4.6                        | -37.3 ± 2.5                       | -122.2 ± 5.3                      | -31 ± 2.9                        | -98.2 ± 11.2                     |
| 14  | 2P93             | -12.1            | -26.8 ± 2.7                        | -23 ± 2.2                         | -97.8 ± 3.9                       | -29.6 ± 2.9                      | -69.9 ± 8.9                      |
| 15  | 2BOH             | -11.7            | -17.8 ± 2.8                        | -17.5 ± 1.9                       | -116.2 ± 3.8                      | -39.1 ± 2.6                      | -77.3 ± 8.4                      |
| 16  | 2BQW             | -11.7            | -28.5 ± 2.4                        | -23.4 ± 2.3                       | -116.9 ± 4.5                      | -31.2 ± 2.9                      | -87.9 ± 9.5                      |

|    |      |       |             |             |              |             |              |
|----|------|-------|-------------|-------------|--------------|-------------|--------------|
| 17 | 2J95 | -11.5 | -39.6 ± 3.8 | -26.8 ± 2.4 | -114.6 ± 3.2 | -29.4 ± 3   | -90.7 ± 8.8  |
| 18 | 2J34 | -10.7 | -32.4 ± 3.1 | -28 ± 2.5   | -106.8 ± 3.9 | -31.7 ± 2.9 | -76.9 ± 9.2  |
| 19 | 1FAX | -10.1 | -56.7 ± 5.4 | -42.2 ± 3.1 | -100.3 ± 6.4 | -28.9 ± 3.5 | -76.8 ± 13   |
| 20 | 2J38 | -10.0 | -29.1 ± 5.6 | -25.7 ± 2.6 | -97.8 ± 5.2  | -29.6 ± 3.1 | -69.6 ± 11.9 |
| 21 | 2BQ7 | -9.7  | -19 ± 3.1   | -18.8 ± 2.1 | -105 ± 3.4   | -30.8 ± 2.5 | -74.3 ± 8.1  |
| 22 | 2UWP | -9.4  | -38.1 ± 3.6 | -26.9 ± 3   | -101.6 ± 3.9 | -28.2 ± 2.7 | -78.2 ± 9.4  |
| 23 | 2J94 | -8.6  | -42.8 ± 3.3 | -37.9 ± 2.8 | -105.2 ± 4.3 | -31.1 ± 3.3 | -76.2 ± 10.2 |

**Table S17** - Average polar and non-polar interaction energy in the bound and free state for 23 Thrombin complexes. Absolute binding free energy  $\Delta G_{LIE}$  was obtained for  $\alpha=0.16$  (optimal value for a set of 23 compounds).

| No. | Thrombin PDB ID | $\Delta G_{exp}$ | $\langle V^{elec} \rangle_{bound}$ | $\langle V^{elec} \rangle_{free}$ | $\langle V^{vdw} \rangle_{bound}$ | $\langle V^{vdw} \rangle_{free}$ | $\Delta G_{LIE}$<br>$\alpha = 0.16$ |
|-----|-----------------|------------------|------------------------------------|-----------------------------------|-----------------------------------|----------------------------------|-------------------------------------|
| 1   | 1SL3            | -16.3            | -48.4 ± 3.5                        | -33.1 ± 3.1                       | -114.3 ± 5.9                      | -34.9 ± 3.1                      | -20.3 ± 4.8                         |
| 2   | 1C4V            | -14.8            | -47.5 ± 3.8                        | -38 ± 2.9                         | -114 ± 6                          | -35.5 ± 3.7                      | -16.7 ± 4.4                         |
| 3   | 1C4U            | -14.2            | -52.7 ± 4.7                        | -35.1 ± 3.1                       | -62.4 ± 4.5                       | -17.3 ± 3.2                      | -14.8 ± 4.6                         |
| 4   | 2ZO3            | -13.7            | -47.4 ± 4.5                        | -40.4 ± 3.3                       | -96.9 ± 5.9                       | -32.1 ± 3.5                      | -13.3 ± 4.9                         |
| 5   | 1TA6            | -12.5            | -31.4 ± 3.7                        | -30.3 ± 2.7                       | -110.1 ± 5.5                      | -34.6 ± 2.9                      | -12.6 ± 4.1                         |
| 6   | 1NT1            | -12.2            | -39.4 ± 3.9                        | -30.9 ± 2.6                       | -110.6 ± 5.5                      | -33.8 ± 3                        | -15.9 ± 4.1                         |
| 7   | 1BMN            | -11.6            | -43.4 ± 5.7                        | -47.7 ± 3.3                       | -110.4 ± 6.9                      | -28.8 ± 3.6                      | -11.5 ± 5                           |
| 8   | 1ETS            | -11.3            | -50.1 ± 6.1                        | -41.2 ± 3.8                       | -103.5 ± 7.8                      | -31.9 ± 3.5                      | -15.3 ± 6.1                         |
| 9   | 2JH6            | -10.7            | -31.2 ± 4                          | -29.3 ± 3.6                       | -101.9 ± 4.7                      | -29.4 ± 3.3                      | -12.4 ± 4.5                         |
| 10  | 3DHK            | -10.0            | -28.9 ± 4.1                        | -27.6 ± 2.4                       | -99.4 ± 4.8                       | -33.8 ± 2.7                      | -11 ± 4                             |
| 11  | 3DUX            | -9.6             | -18.5 ± 3.3                        | -21.1 ± 2.4                       | -98.5 ± 5.4                       | -30.1 ± 2.6                      | -9.8 ± 3.7                          |
| 12  | 2ZC9            | -9.2             | -24.8 ± 3.9                        | -24.5 ± 2.5                       | -85.5 ± 5.5                       | -27.7 ± 2.5                      | -9.3 ± 4.1                          |
| 13  | 2ZGX            | -9.2             | -30.2 ± 3.9                        | -35.8 ± 3                         | -85.2 ± 5                         | -22.1 ± 2.8                      | -7.7 ± 4.2                          |
| 14  | 2JH5            | -9.0             | -31.9 ± 3.3                        | -27.9 ± 2.9                       | -101.7 ± 5                        | -30.2 ± 2.9                      | -13.2 ± 3.9                         |
| 15  | 1AWH            | -8.3             | -42.4 ± 4.1                        | -36.4 ± 2.9                       | -98.7 ± 6.3                       | -31.2 ± 3.6                      | -12.8 ± 3.9                         |
| 16  | 1D6W            | -8.2             | -53.2 ± 5.4                        | -46.9 ± 3.2                       | -104 ± 7.1                        | -30.7 ± 3.4                      | -14.4 ± 5.4                         |
| 17  | 3SHC            | -7.8             | -25.8 ± 3.3                        | -30 ± 2.8                         | -87.7 ± 4.6                       | -27 ± 3                          | -7.9 ± 3.8                          |
| 18  | 3SHA            | -7.7             | -26.7 ± 3.3                        | -28.2 ± 2.9                       | -87.8 ± 5.3                       | -27 ± 2.8                        | -9.1 ± 4                            |
| 19  | 2ZFP            | -7.1             | -24.8 ± 3.8                        | -21.8 ± 2.3                       | -74.8 ± 5.9                       | -22.8 ± 2.6                      | -9.6 ± 4                            |
| 20  | 3F68            | -6.9             | -21 ± 4.4                          | -19 ± 2.2                         | -100 ± 5.5                        | -32.4 ± 2.3                      | -11.7 ± 4.1                         |
| 21  | 3EGK            | -6.4             | -21.4 ± 2.4                        | -20.8 ± 2.4                       | -90.5 ± 5.4                       | -32.4 ± 2.7                      | -9.5 ± 3.4                          |
| 22  | 3P17            | -6.1             | -24.3 ± 4                          | -31.9 ± 2.6                       | -79.7 ± 5                         | -25.5 ± 3.1                      | -5.4 ± 4.2                          |
| 23  | 3SV2            | -5.8             | -27.1 ± 4.3                        | -30.7 ± 2.6                       | -78.2 ± 5.1                       | -25.5 ± 3.2                      | -6.9 ± 4.3                          |

**Table S18** - Average polar and non-polar interaction energy in the bound and free state for 23 HIV-1 complexes. Absolute binding free energy  $\Delta G_{LIE}$  was obtained for  $\alpha=0.16$  (optimal value for a set of 23 compounds).

| No. | HIV-1 PDB ID | $\Delta G_{\text{exp}}$ | $\langle V^{\text{elec}} \rangle_{\text{bound}}$ | $\langle V^{\text{elec}} \rangle_{\text{free}}$ | $\langle V^{\text{vdw}} \rangle_{\text{bound}}$ | $\langle V^{\text{vdw}} \rangle_{\text{free}}$ | $\Delta G_{\text{LIE}}$<br>$\alpha = 0.43$ |
|-----|--------------|-------------------------|--------------------------------------------------|-------------------------------------------------|-------------------------------------------------|------------------------------------------------|--------------------------------------------|
| 1   | 1HVK         | -15.04                  | -72.8 ± 6.4                                      | -85.8 ± 4.0                                     | -103.5 ± 10.9                                   | -48.6 ± 4.7                                    | -19.3 ± 10.2                               |
| 2   | 1HVL         | -13.66                  | -73.8 ± 6.2                                      | -82.5 ± 4.4                                     | -101.8 ± 10.8                                   | -49.3 ± 4.7                                    | -19.7 ± 10.1                               |
| 3   | 1EBY         | -13.31                  | -63.7 ± 6.4                                      | -81.3 ± 2.5                                     | -88.4 ± 11.8                                    | -39.9 ± 3.4                                    | -15.0 ± 9.5                                |
| 4   | 1C6Y         | -13.05                  | -55.4 ± 5.2                                      | -73.8 ± 4.3                                     | -84.1 ± 8.5                                     | -40.9 ± 5.1                                    | -12.5 ± 9.0                                |
| 5   | 2BPX         | -12.9                   | -70.2 ± 6.9                                      | -68.3 ± 3.9                                     | -78.3 ± 7.7                                     | -41.3 ± 4.0                                    | -16.5 ± 8.6                                |
| 6   | 1EC3         | -12.4                   | -87.9 ± 8.0                                      | -83.4 ± 4.4                                     | -110.5 ± 11.6                                   | -50.3 ± 3.9                                    | -27.4 ± 10.7                               |
| 7   | 1EC1         | -12.24                  | -65.8 ± 6.1                                      | -86.4 ± 3.6                                     | -94.1 ± 9.6                                     | -49.4 ± 4.4                                    | -12.4 ± 9.2                                |
| 8   | 2CEJ         | -11.83                  | -57.5 ± 8.3                                      | -71.8 ± 3.6                                     | -71.7 ± 8.1                                     | -40.1 ± 3.1                                    | -8.9 ± 8.7                                 |
| 9   | 2UXZ         | -11.64                  | -57.6 ± 4.3                                      | -77.7 ± 3.2                                     | -81.6 ± 7.7                                     | -40.7 ± 5.1                                    | -11.0 ± 8.0                                |
| 10  | 1D4J         | -11.47                  | -65.4 ± 5.0                                      | -76.3 ± 3.5                                     | -76.9 ± 9.1                                     | -42.3 ± 3.7                                    | -11.3 ± 8.3                                |
| 11  | 2CEN         | -11.39                  | -57.3 ± 6.7                                      | -77.5 ± 3.4                                     | -89.0 ± 9.2                                     | -41.7 ± 4.0                                    | -13.7 ± 9.0                                |
| 12  | 1G35         | -11.17                  | -68.7 ± 5.6                                      | -71.4 ± 3.4                                     | -73.1 ± 7.6                                     | -40.8 ± 3.7                                    | -13.0 ± 7.8                                |
| 13  | 2BQV         | -11.04                  | -55.8 ± 5.8                                      | -69.5 ± 3.2                                     | -75.6 ± 7.3                                     | -36.7 ± 3.1                                    | -12.2 ± 7.5                                |
| 14  | 1SBG         | -10.63                  | -42.9 ± 6.6                                      | -64.3 ± 3.2                                     | -73.9 ± 8.6                                     | -32.7 ± 3.2                                    | -9.8 ± 8.7                                 |
| 15  | 2BPV         | -10.53                  | -58.7 ± 4.9                                      | -74.7 ± 3.2                                     | -83.1 ± 9.7                                     | -42.9 ± 4.0                                    | -12.0 ± 8.6                                |
| 16  | 2BPY         | -10.16                  | -71.8 ± 5.4                                      | -82.9 ± 3.8                                     | -89.2 ± 9.6                                     | -48.7 ± 4.2                                    | -13.7 ± 9.0                                |
| 17  | 2UPJ         | -10.14                  | -60.7 ± 7.0                                      | -61.9 ± 3.8                                     | -64.0 ± 6.1                                     | -41.5 ± 3.5                                    | -9.2 ± 8.1                                 |
| 18  | 2UY0         | -9.5                    | -45.7 ± 7.0                                      | -80.8 ± 3.5                                     | -82.4 ± 7.9                                     | -41.5 ± 3.9                                    | -6.0 ± 8.5                                 |
| 19  | 2PWR         | -9.04                   | -61.9 ± 6.4                                      | -66.5 ± 3.8                                     | -89.9 ± 8.2                                     | -35.9 ± 3.8                                    | -21.2 ± 9.6                                |
| 20  | 2PWC         | -9.02                   | -53.0 ± 5.9                                      | -61.1 ± 2.9                                     | -79.2 ± 8.4                                     | -29.4 ± 3.8                                    | -17.9 ± 9.0                                |
| 21  | 1HBV         | -8.74                   | -70.6 ± 8.4                                      | -64.0 ± 4.5                                     | -74.6 ± 8.6                                     | -38.8 ± 4.0                                    | -18.2 ± 11.0                               |
| 22  | 3BGB         | -8.3                    | -48.7 ± 5.1                                      | -63.1 ± 2.9                                     | -76.7 ± 6.5                                     | -34.2 ± 4.0                                    | -12.1 ± 8.0                                |
| 23  | 3BGC         | -6.89                   | -47.4 ± 7.4                                      | -69.0 ± 3.4                                     | -86.2 ± 8.3                                     | -35.0 ± 5.2                                    | -12.7 ± 10.4                               |

**Table S19** - Average polar and non-polar interaction energy in the bound and free state for 23 MCL-1 complexes. Absolute binding free energy  $\Delta G_{\text{LIE}}$  was obtained for  $\alpha=0.16$  (optimal value for a set of 23 compounds) and  $\alpha=0.11$  (optimal value for a combined set of 69 compounds).

| No. | MCL-1 PDB ID | $\Delta G_{\text{exp}}$ | $\langle V^{\text{elec}} \rangle_{\text{bound}}$ | $\langle V^{\text{elec}} \rangle_{\text{free}}$ | $\langle V^{\text{vdw}} \rangle_{\text{bound}}$ | $\langle V^{\text{vdw}} \rangle_{\text{free}}$ | $\Delta G_{\text{LIE}}$<br>$\alpha = 1$ |
|-----|--------------|-------------------------|--------------------------------------------------|-------------------------------------------------|-------------------------------------------------|------------------------------------------------|-----------------------------------------|
| 1   | 6NE5         | -14.44                  | -130.1 ± 3.0                                     | -140.8 ± 7.6                                    | -60.5 ± 2.0                                     | -35.2 ± 4.0                                    | -21.3 ± 10.0                            |
| 2   | 6OQC         | -14.27                  | -45.4 ± 2.6                                      | -56.5 ± 5.8                                     | -69.4 ± 1.4                                     | -39.2 ± 3.5                                    | -26.1 ± 8.0                             |
| 3   | 6OQB         | -14.14                  | -45.9 ± 2.8                                      | -57.0 ± 5.8                                     | -69.4 ± 1.6                                     | -40.6 ± 3.3                                    | -24.7 ± 8.0                             |
| 4   | 6UDV         | -14.13                  | -53.9 ± 3.2                                      | -61.8 ± 6.2                                     | -69.4 ± 2.0                                     | -40.8 ± 3.8                                    | -25.7 ± 9.2                             |
| 5   | 6UD2         | -14.01                  | -57.2 ± 7.7                                      | -71.8 ± 9.8                                     | -89.5 ± 1.6                                     | -57.1 ± 3.9                                    | -27.1 ± 12.0                            |
| 6   | 6UDI         | -13.73                  | -49.4 ± 4.7                                      | -62.4 ± 7.8                                     | -75.3 ± 1.8                                     | -47.5 ± 3.7                                    | -22.9 ± 10.1                            |
| 7   | 6UDT         | -13.73                  | -46.3 ± 5.8                                      | -51.3 ± 7.4                                     | -64.6 ± 2.7                                     | -39.8 ± 3.6                                    | -23.1 ± 10.6                            |
| 8   | 6OQD         | -13.53                  | -45.4 ± 2.6                                      | -57.8 ± 5.9                                     | -67.2 ± 1.5                                     | -39.9 ± 3.5                                    | -22.7 ± 8.1                             |

|    |      |        |              |             |             |             |              |
|----|------|--------|--------------|-------------|-------------|-------------|--------------|
| 9  | 5FDR | -12.9  | -86.0 ± 2.6  | -96.4 ± 7.4 | -54.4 ± 1.9 | -35.6 ± 4.5 | -15.0 ± 10.0 |
| 10 | 6UDU | -12.77 | -48.0 ± 10.0 | -49.5 ± 5.8 | -62.1 ± 1.9 | -35.8 ± 3.4 | -25.8 ± 10.5 |
| 11 | 6BW8 | -12.61 | -53.6 ± 1.9  | -62.4 ± 6.1 | -68.9 ± 1.6 | -42.7 ± 3.8 | -22.9 ± 8.3  |
| 12 | 6B4U | -11.04 | -32.4 ± 6.4  | -51.2 ± 5.6 | -59.3 ± 2.7 | -36.8 ± 3.6 | -15.5 ± 10.7 |
| 13 | 6BW2 | -10.54 | -49.6 ± 3.9  | -65.9 ± 6.0 | -63.7 ± 3.3 | -40.2 ± 3.4 | -17.4 ± 10.4 |
| 14 | 5IEZ | -10.48 | -73.3 ± 2.7  | -75.7 ± 8.0 | -53.6 ± 1.6 | -34.8 ± 4.1 | -17.9 ± 9.7  |
| 15 | 6QYP | -10.07 | -52.1 ± 3.6  | -52.6 ± 5.3 | -50.8 ± 2.0 | -36.3 ± 3.3 | -14.3 ± 8.2  |
| 16 | 6QZ8 | -10.01 | -48.3 ± 3.6  | -54.0 ± 5.8 | -44.8 ± 1.4 | -26.4 ± 3.2 | -16.5 ± 7.8  |
| 17 | 4HW2 | -9.96  | -41.2 ± 1.7  | -45.0 ± 4.7 | -42.6 ± 1.7 | -24.4 ± 2.8 | -16.8 ± 6.9  |
| 18 | 5FC4 | -9.11  | -53.0 ± 2.5  | -58.6 ± 5.5 | -43.7 ± 2.2 | -29.9 ± 3.0 | -11.4 ± 8.7  |
| 19 | 4ZBI | -8.93  | -30.2 ± 2.2  | -37.2 ± 4.9 | -46.8 ± 1.2 | -27.0 ± 2.7 | -17.2 ± 6.6  |
| 20 | 4HW3 | -8.91  | -24.1 ± 2.7  | -31.6 ± 4.7 | -45.9 ± 2.0 | -26.1 ± 2.8 | -17.0 ± 7.6  |
| 21 | 6B4L | -8.88  | -34.0 ± 3.0  | -48.9 ± 5.7 | -42.0 ± 1.4 | -23.0 ± 2.9 | -13.4 ± 7.6  |
| 22 | 5FDO | -8.84  | -50.7 ± 2.6  | -58.4 ± 5.1 | -53.5 ± 1.2 | -34.0 ± 3.4 | -16.2 ± 7.9  |
| 23 | 6QZB | -7.71  | -31.2 ± 4.2  | -35.8 ± 7.8 | -44.0 ± 1.3 | -28.5 ± 3.1 | -13.8 ± 8.8  |

**Table S20** - Average polar and non-polar interaction energy in the bound and free state for 23 CDK-2 complexes. Absolute binding free energy  $\Delta G_{\text{LIE}}$  was obtained for  $\alpha=0.16$  (optimal value for a set of 23 compounds) and  $\alpha=0.11$  (optimal value for a combined set of 69 compounds).

| No. | CDK-2 PDB ID | $\Delta G_{\text{exp}}$ | $\langle V^{\text{elec}} \rangle_{\text{bound}}$ | $\langle V^{\text{elec}} \rangle_{\text{free}}$ | $\langle V^{\text{vdw}} \rangle_{\text{bound}}$ | $\langle V^{\text{vdw}} \rangle_{\text{free}}$ | $\Delta G_{\text{LIE}} \alpha = 1$ |
|-----|--------------|-------------------------|--------------------------------------------------|-------------------------------------------------|-------------------------------------------------|------------------------------------------------|------------------------------------|
| 1   | 2FVD         | -11.7                   | -39.3 ± 5.4                                      | -61.1 ± 7.6                                     | -55.3 ± 3.2                                     | -29.7 ± 4.4                                    | -16.1 ± 13.2                       |
| 2   | 4BCK         | -11.53                  | -56.7 ± 6.8                                      | -63.2 ± 8.8                                     | -43.2 ± 4.1                                     | -27.2 ± 4.5                                    | -13.3 ± 15.3                       |
| 3   | 4BCN         | -10.87                  | -40.2 ± 5.1                                      | -43.9 ± 6.2                                     | -41.7 ± 3.5                                     | -37.0 ± 3.8                                    | -3.3 ± 11.6                        |
| 4   | 1PF8         | -10.31                  | -20.9 ± 3.4                                      | -37.3 ± 6.3                                     | -35.0 ± 2.4                                     | -19.7 ± 3.6                                    | -8.2 ± 10.2                        |
| 5   | 5D1J         | -10.18                  | -36.3 ± 4.8                                      | -41.5 ± 6.4                                     | -48.0 ± 3.5                                     | -33.1 ± 3.9                                    | -12.7 ± 12.2                       |
| 6   | 1PXM         | -9.91                   | -32.6 ± 5.3                                      | -36.3 ± 5.7                                     | -37.6 ± 3.6                                     | -23.3 ± 3.5                                    | -12.9 ± 11.2                       |
| 7   | 1PXN         | -9.82                   | -37.4 ± 5.1                                      | -41.3 ± 6.6                                     | -39.9 ± 3.5                                     | -23.9 ± 3.5                                    | -14.6 ± 11.4                       |
| 8   | 4BCM         | -9.48                   | -32.3 ± 6.0                                      | -54.4 ± 7.0                                     | -58.0 ± 3.7                                     | -37.9 ± 4.0                                    | -10.5 ± 13.3                       |
| 9   | 4BCO         | -9.45                   | -40.6 ± 5.9                                      | -57.4 ± 7.0                                     | -61.0 ± 3.8                                     | -36.7 ± 4.0                                    | -17.1 ± 13.4                       |
| 10  | 4BCQ         | -9.38                   | -47.2 ± 6.7                                      | -53.5 ± 7.0                                     | -45.0 ± 3.8                                     | -32.4 ± 4.1                                    | -9.9 ± 13.8                        |
| 11  | 4ACM         | -9.17                   | -61.4 ± 8.9                                      | -72.5 ± 8.4                                     | -54.2 ± 4.5                                     | -33.5 ± 4.6                                    | -16.0 ± 16.6                       |
| 12  | 1PXP         | -9.14                   | -19.7 ± 4.4                                      | -34.6 ± 5.5                                     | -47.4 ± 3.3                                     | -27.6 ± 3.1                                    | -13.4 ± 10.6                       |
| 13  | 1PXL         | -8.97                   | -25.4 ± 3.8                                      | -24.3 ± 4.6                                     | -43.8 ± 3.1                                     | -33.0 ± 3.0                                    | -11.2 ± 9.8                        |
| 14  | 1PYE         | -8.8                    | -31.9 ± 5.3                                      | -44.5 ± 6.5                                     | -39.2 ± 3.3                                     | -26.4 ± 4.1                                    | -7.3 ± 12.5                        |
| 15  | 4EOR         | -8.65                   | -53.6 ± 8.3                                      | -57.5 ± 8.0                                     | -48.8 ± 4.1                                     | -28.5 ± 4.1                                    | -18.6 ± 15.2                       |
| 16  | 4BCP         | -8.57                   | -66.6 ± 7.3                                      | -67.5 ± 7.7                                     | -48.4 ± 4.1                                     | -32.3 ± 5.2                                    | -15.7 ± 15.8                       |
| 17  | 4EOS         | -8.3                    | -24.9 ± 5.2                                      | -30.8 ± 5.8                                     | -43.5 ± 3.7                                     | -30.2 ± 3.5                                    | -10.8 ± 12.0                       |
| 18  | 1E1X         | -8.08                   | -24.8 ± 5.6                                      | -32.8 ± 7.4                                     | -34.6 ± 3.0                                     | -23.8 ± 3.7                                    | -7.4 ± 12.3                        |
| 19  | 1JSV         | -7.82                   | -57.5 ± 7.4                                      | -55.1 ± 9.2                                     | -30.0 ± 4.0                                     | -16.6 ± 4.4                                    | -14.5 ± 15.6                       |

|    |      |       |             |             |             |             |              |
|----|------|-------|-------------|-------------|-------------|-------------|--------------|
| 20 | 1OGU | -7.71 | -35.2 ± 5.7 | -42.3 ± 6.9 | -49.2 ± 3.6 | -29.3 ± 3.6 | -16.8 ± 12.6 |
| 21 | 1PXJ | -7.12 | -24.5 ± 3.6 | -25.6 ± 5.2 | -30.6 ± 2.4 | -16.5 ± 2.8 | -13.6 ± 9.0  |
| 22 | 1E1V | -6.75 | -27.0 ± 3.7 | -39.6 ± 6.1 | -33.0 ± 3.2 | -23.1 ± 3.3 | -4.5 ± 10.7  |
| 23 | 1V1K | -6.12 | -44.0 ± 6.0 | -46.4 ± 6.7 | -50.6 ± 3.9 | -35.6 ± 4.4 | -14.1 ± 12.9 |

**Table S21** - Minimum value of RMSED and  $\alpha_{\min}$  for all studied data sets. Correlation coefficient  $R$  at  $\alpha_{\min}$  is given in the last column.

| Dataset                                                        | min RMSED (kcal/mol) | $\alpha_{\min}$ | $R$ at $\alpha_{\min}$ |
|----------------------------------------------------------------|----------------------|-----------------|------------------------|
| Beta-lactamase                                                 | 2.9                  | 0.16            | 0.53                   |
| Factor Xa                                                      | 3.7                  | 0.12            | 0.17                   |
| Thrombin                                                       | 3.1                  | 0.13            | 0.80                   |
| HIV-1                                                          | 4.2                  | 0.35            | 0.23                   |
| MCL-1                                                          | 1.4                  | 0.61            | 0.78                   |
| CDK-2                                                          | 46.4                 | 0               | 0                      |
| All six sets                                                   | 7.5                  | 0.19            | 0.28                   |
| Combined set of thrombin, factor Xa, beta-lactamase, and MCL-1 | 6.3                  | 0.15            | 0.35                   |
| Combined set of HIV-1 and CDK-2                                | 5.9                  | 0.40            | 0.47                   |
| Combined set of thrombin, factor Xa, beta-lactamase            | 4.4                  | 0.13            | 0.85                   |

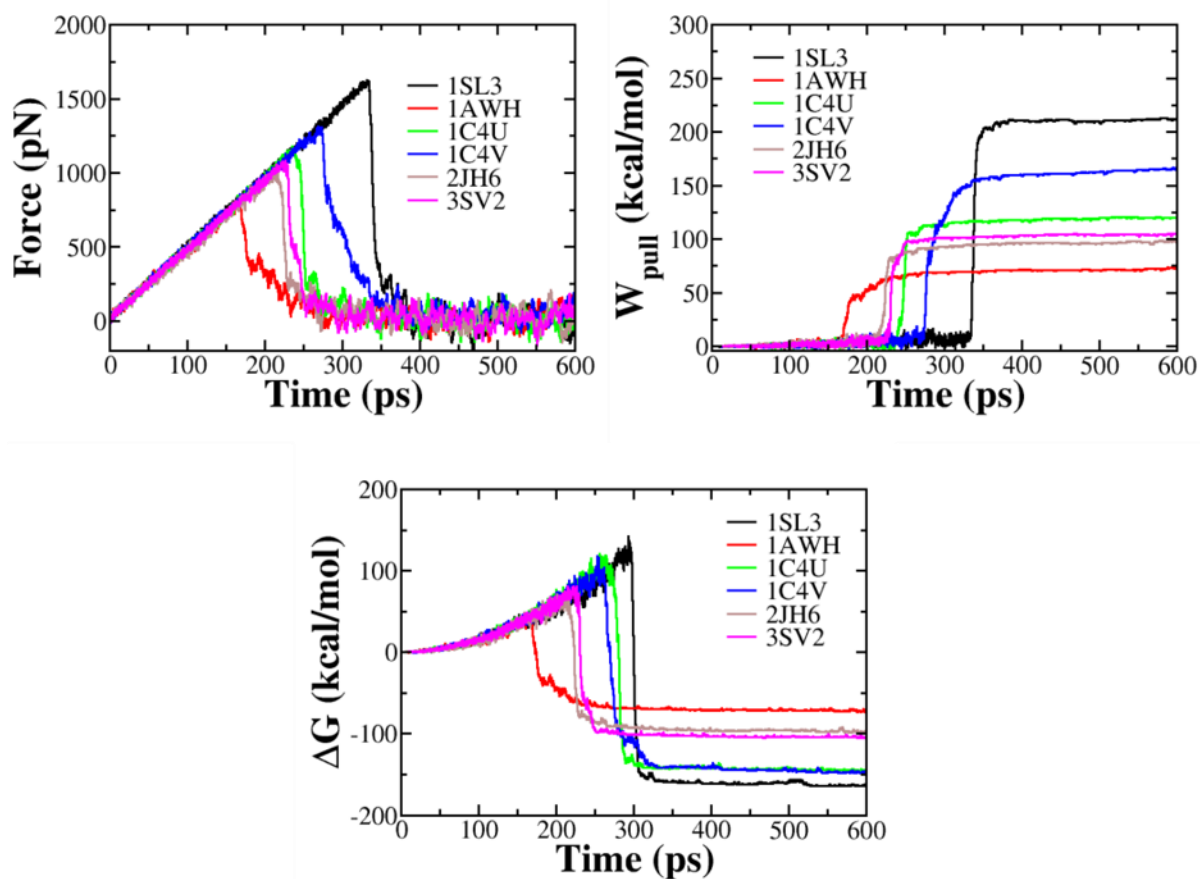

**Figure S1** - Time dependence of the force, pulling work, and Jarzynski's binding free energy for six reference ligands of thrombin. Results were obtained in one SMD run.



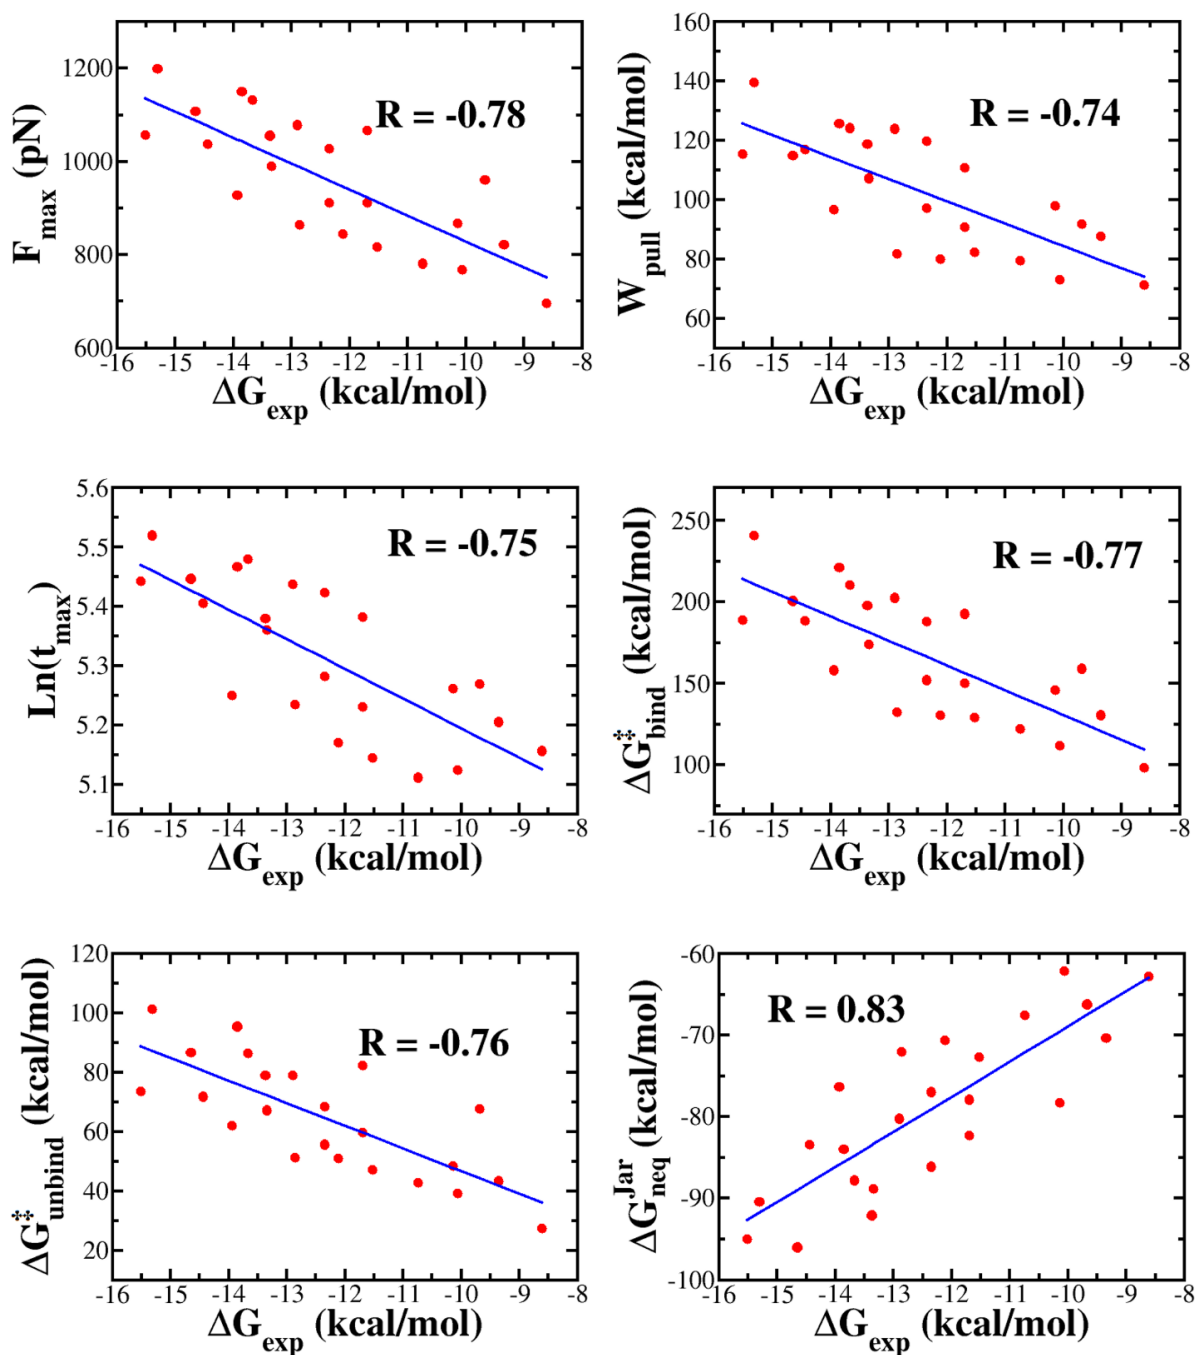

**Figure S2** - Correlation between the experimental binding free energy  $\Delta G_{exp}$  and the rupture force  $F_{max}$ , pulling work  $W_{pull}$ , rupture time  $t_{max}$ , binding  $\Delta G_{bind}^{\ddagger}$  and unbinding  $\Delta G_{unbind}^{\ddagger}$  barriers and Jarzynski's binding free energy  $\Delta G_{neq}^{Jar}$ , obtained in the SMD simulation for the factor Xa complexes. Correlation coefficient  $R$  is also shown.

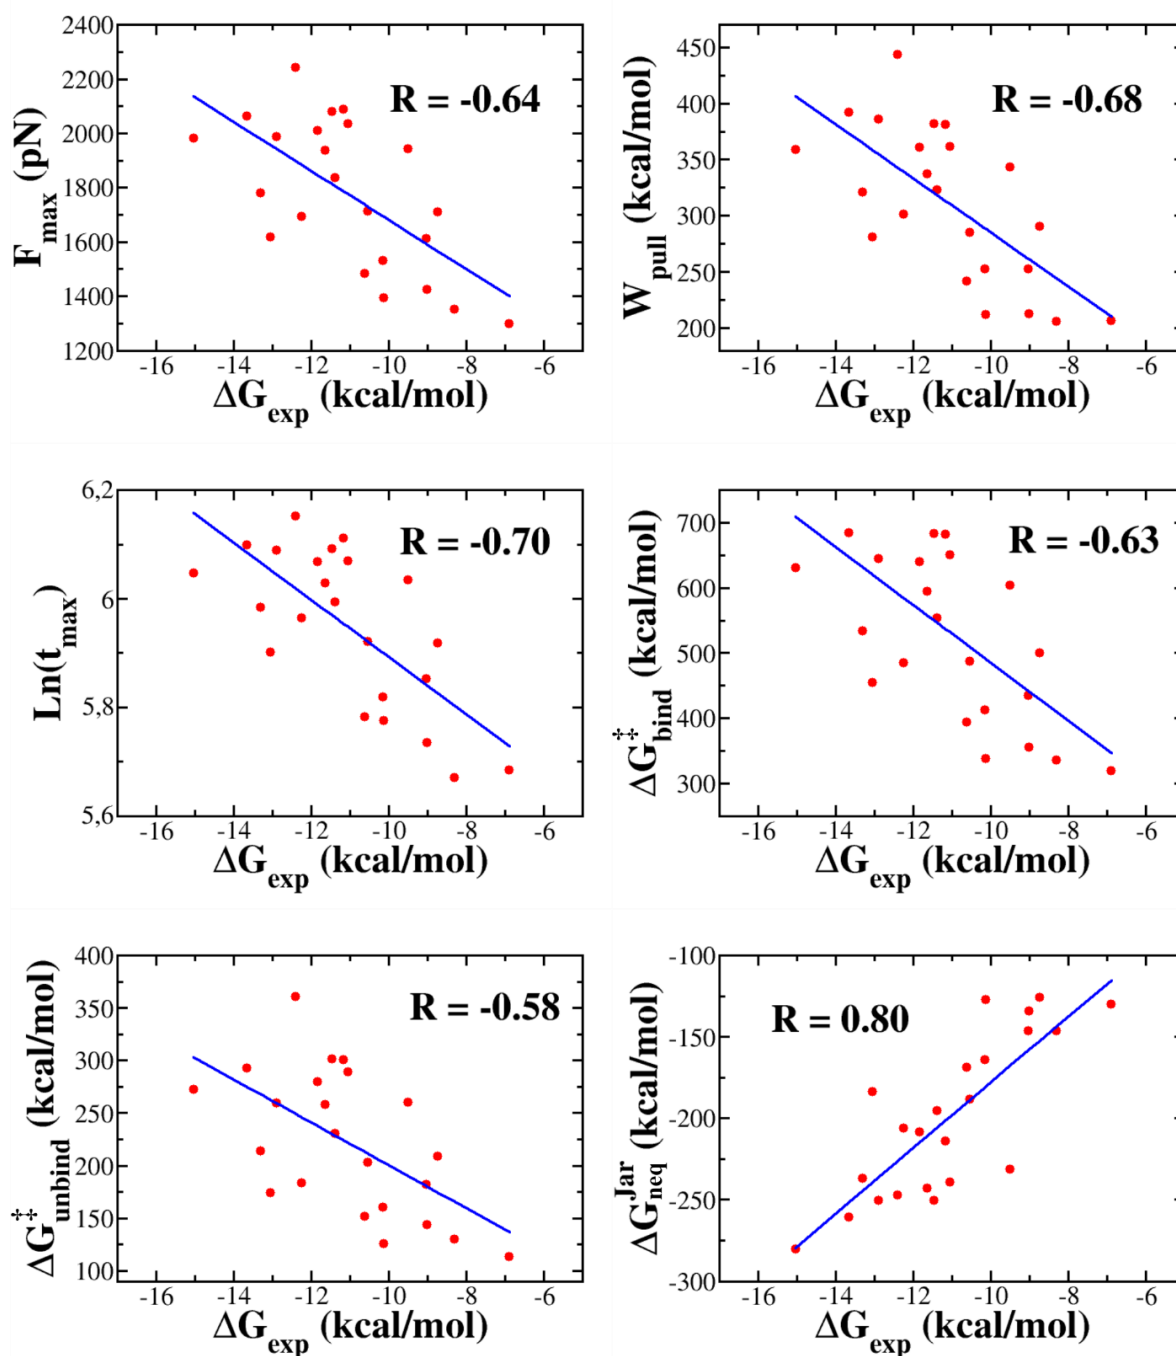

**Figure S3** - Correlation between the experimental binding free energy  $\Delta G_{exp}$  and the rupture force  $F_{max}$ , pulling work  $W_{pull}$ , rupture time  $t_{max}$ , binding  $\Delta G_{bind}^{\ddagger}$  and unbinding  $\Delta G_{unbind}^{\ddagger}$  barriers and Jarzynski's binding free energy  $\Delta G_{neq}^{Jar}$ , obtained in the SMD simulation for the HIV-1 complexes. Correlation coefficient  $R$  is also shown.

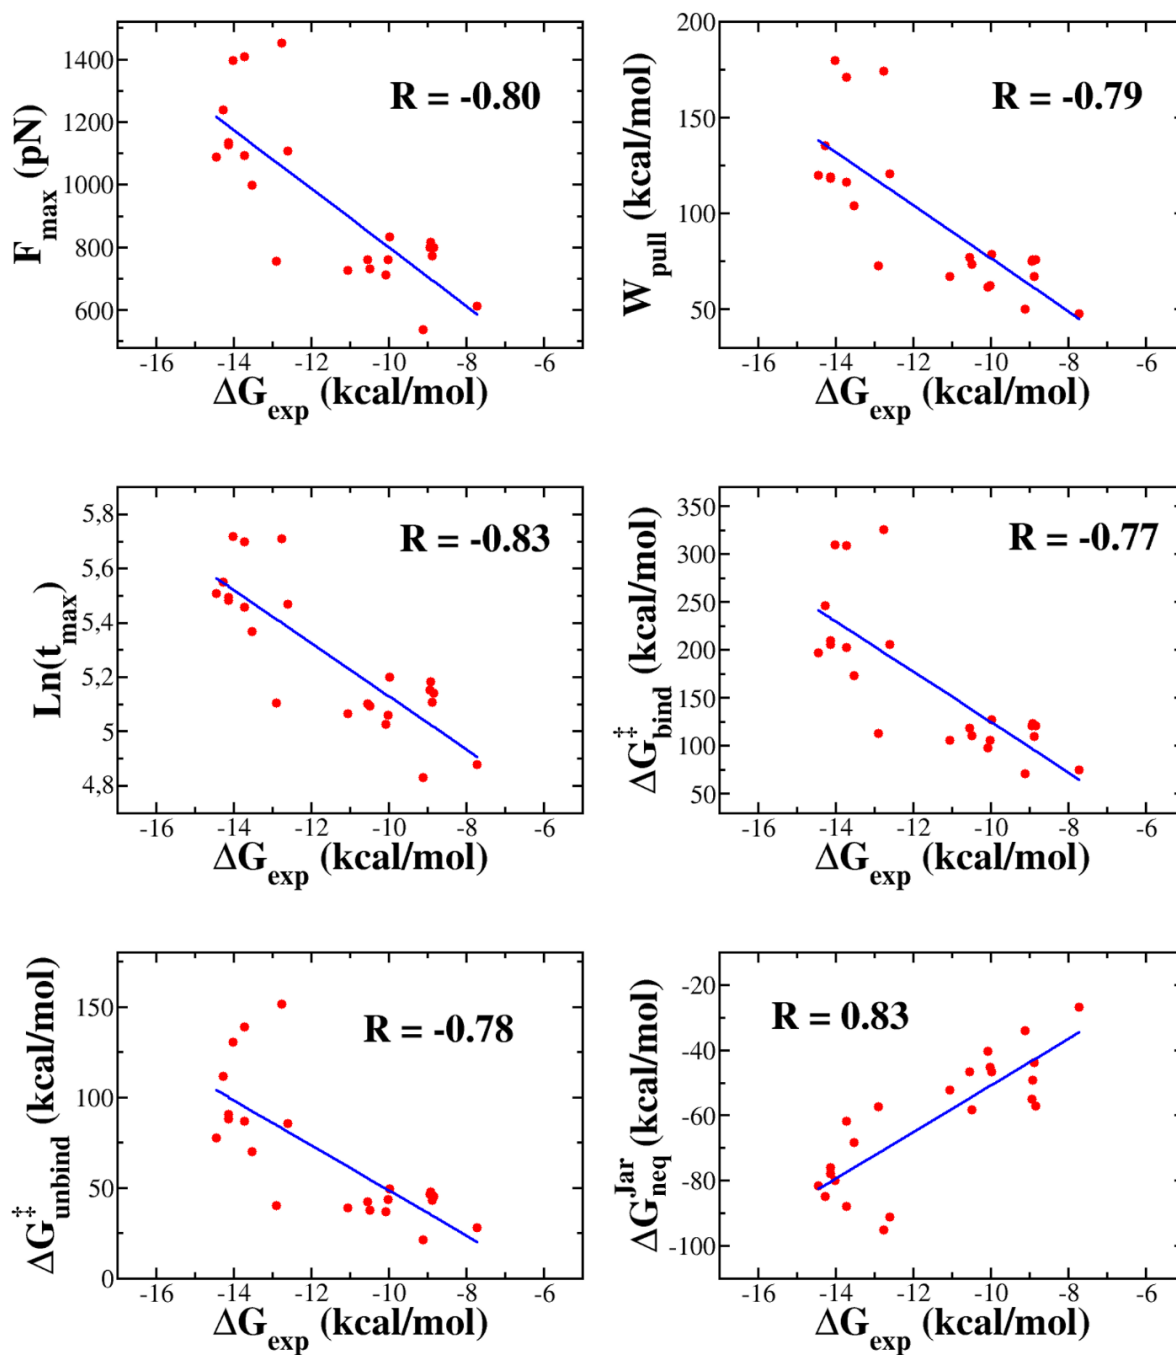

**Figure S4** - Correlation between the experimental binding free energy  $\Delta G_{exp}$  and the rupture force  $F_{max}$ , pulling work  $W_{pull}$ , rupture time  $t_{max}$ , binding  $\Delta G_{bind}^{\ddagger}$  and unbinding  $\Delta G_{unbind}^{\ddagger}$  barriers and Jarzynski's binding free energy  $\Delta G_{neq}^{Jar}$ , obtained in the SMD simulation for the MCL-1 complexes. Correlation coefficient  $R$  is also shown.

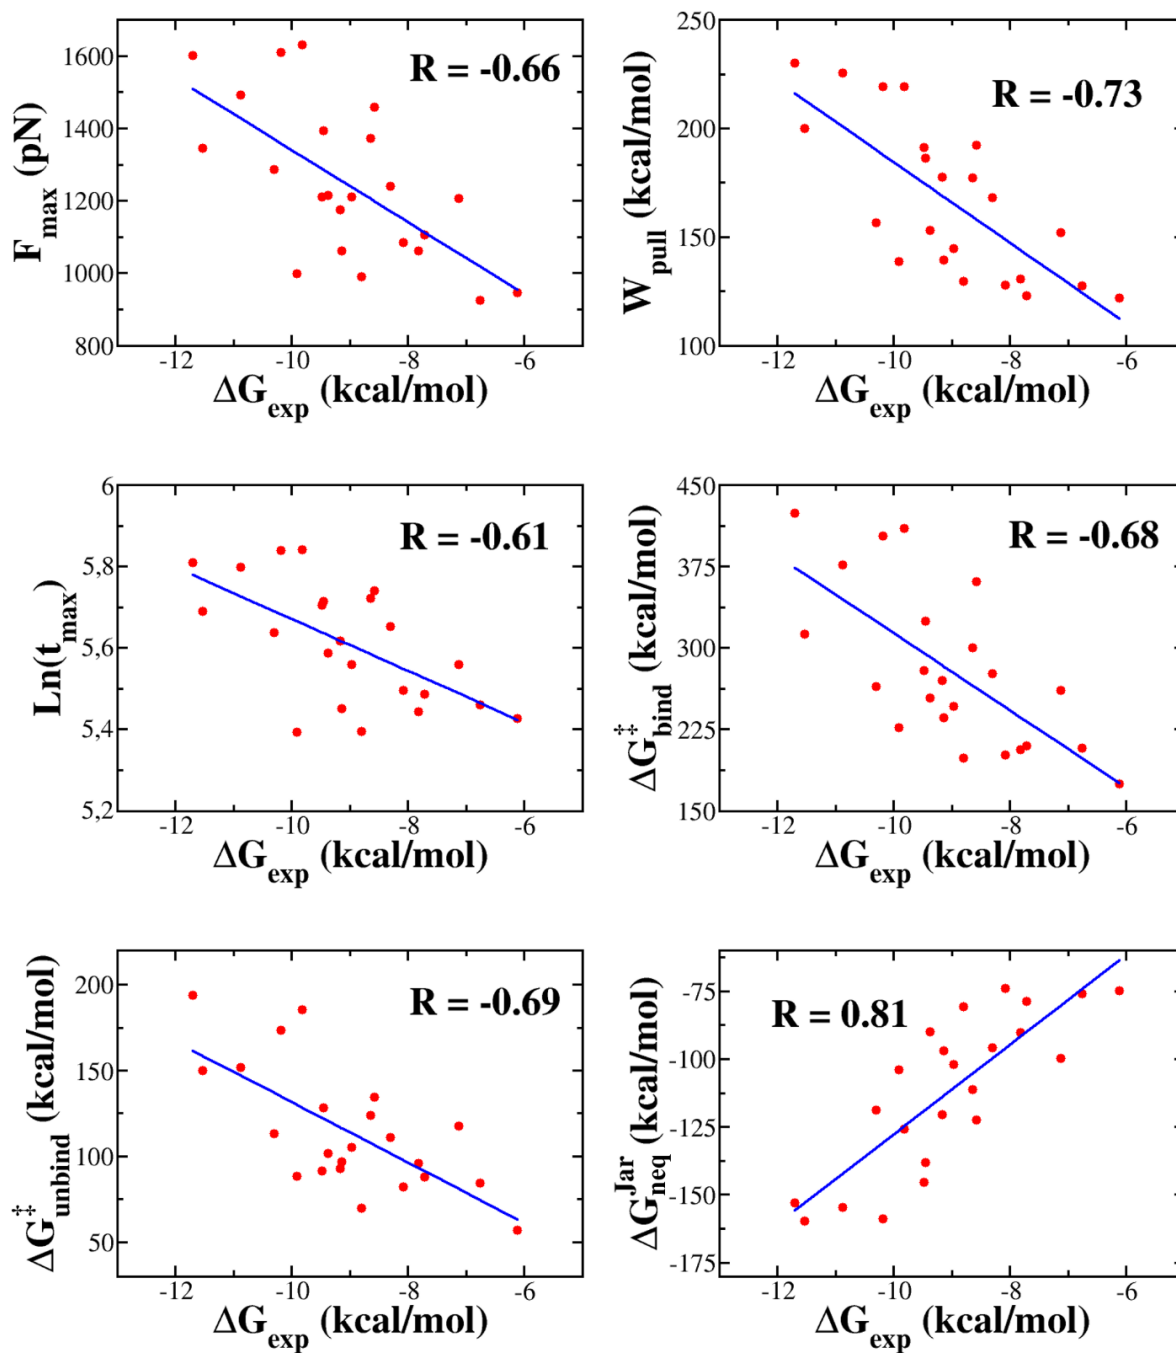

**Figure S5** - Correlation between the experimental binding free energy  $\Delta G_{\text{exp}}$  and the rupture force  $F_{\text{max}}$ , pulling work  $W_{\text{pull}}$ , rupture time  $t_{\text{max}}$ , binding  $\Delta G_{\text{bind}}^{\ddagger}$  and unbinding  $\Delta G_{\text{unbind}}^{\ddagger}$  barriers and Jarzynski's binding free energy  $\Delta G_{\text{neq}}^{\text{Jar}}$ , obtained in the SMD simulation for the CDK-2 complexes. Correlation coefficient  $R$  is also shown.

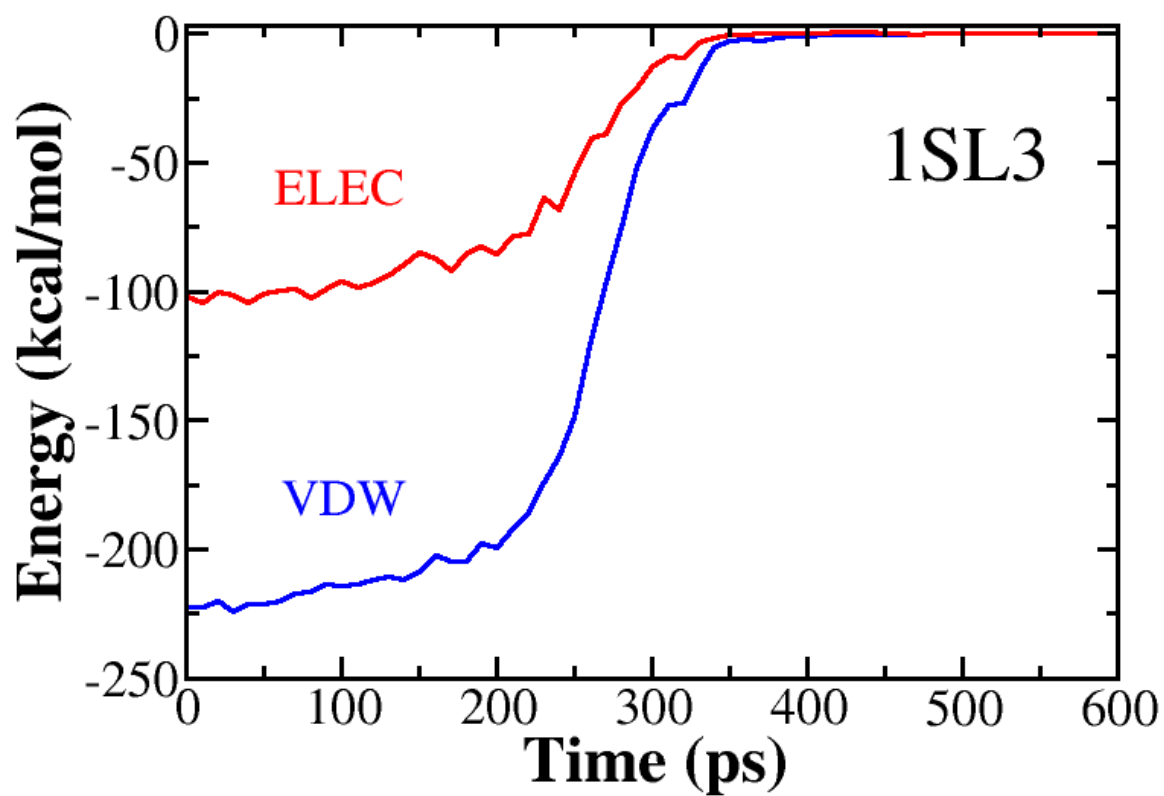

**Figure S6** - The time dependence of polar and non-polar interaction energy between the ligand and protein in the absence of water for the 1SL3 complex from the thrombin set. The data were obtained by averaging over 20 trajectories.

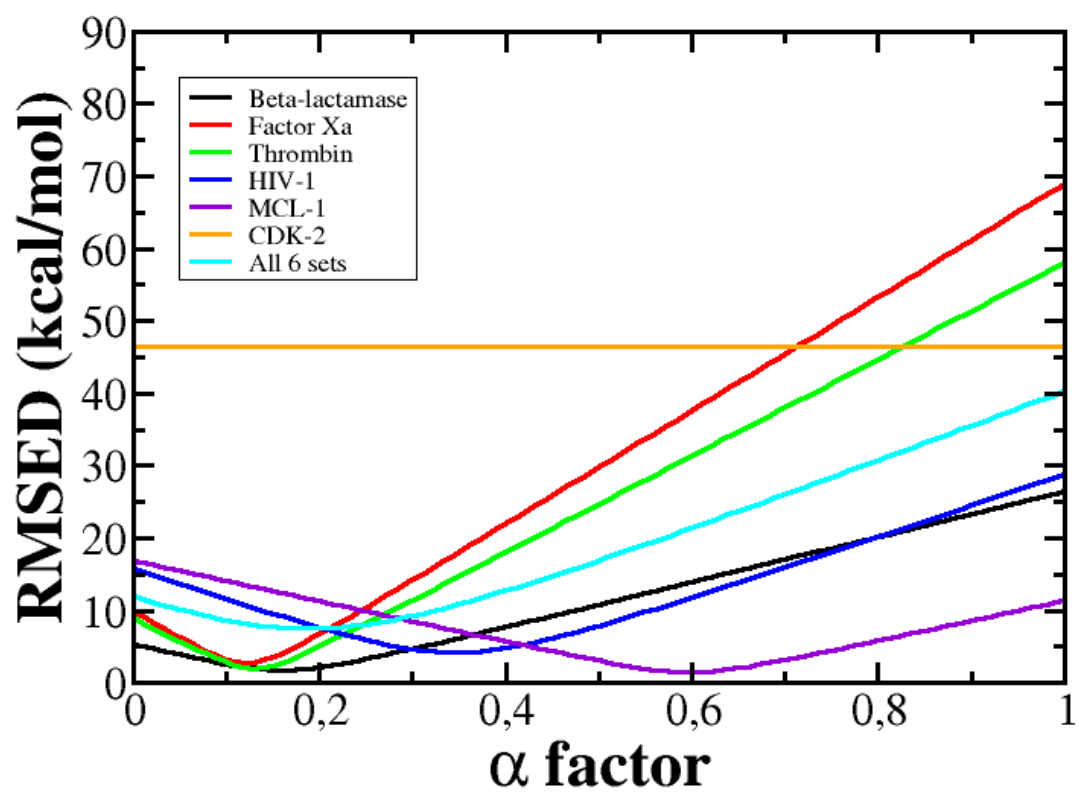

Figure S7 - Dependence of RMSED on  $\alpha$  for six data sets and the combination of all 6 sets.

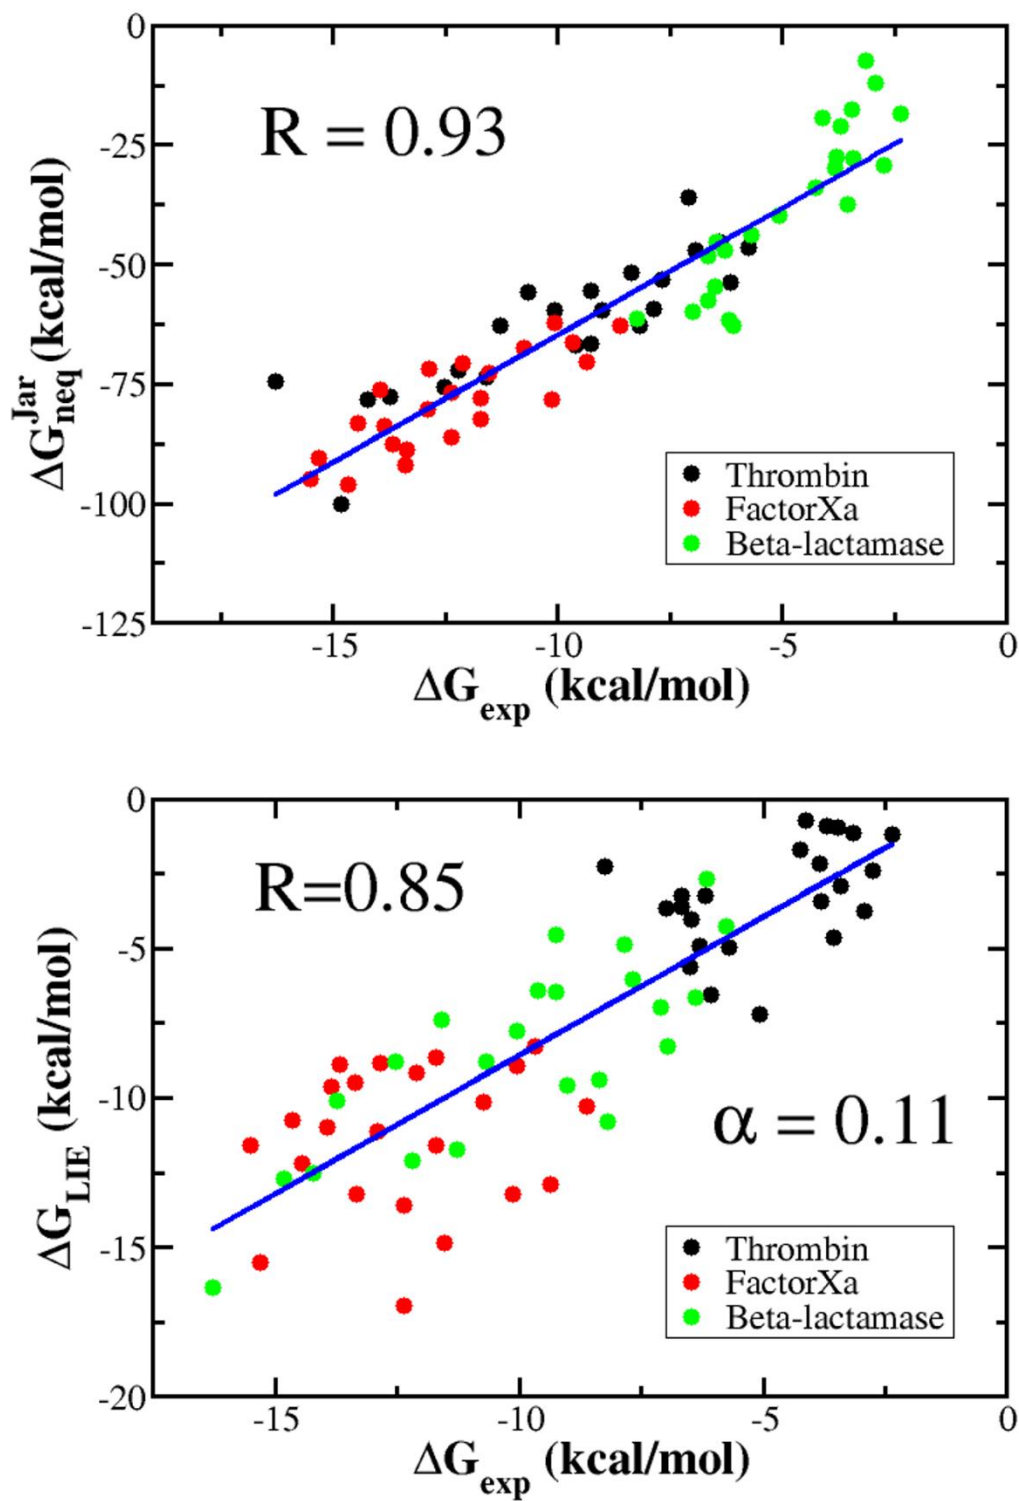

**Figure S8.** Correlation between the binding free energies of Jarzynski (upper panel) and LIE (lower panel) with the experimental binding free energy for 3 combined data sets including beta-lactamase, thrombin, and factor Xa.  $\Delta G_{\text{LIE}}$  was obtained using  $\alpha=0.11$ .

## Reference

1. Young, M.B., et al., *Discovery and evaluation of potent P1 aryl heterocycle-based thrombin inhibitors*. J Med Chem, 2004. **47**(12): p. 2995-3008.
2. Krishnan, R., et al., *Structure of thrombin complexed with selective non-electrophilic inhibitors having cyclohexyl moieties at P1*. Acta Crystallogr D Biol Crystallogr, 2000. **56**(Pt 3): p. 294-303.
3. Baum, B., et al., *Think twice: understanding the high potency of bis(phenyl)methane inhibitors of thrombin*. J Mol Biol, 2009. **391**(3): p. 552-64.
4. Tucker, T.J., et al., *Design and synthesis of a series of potent and orally bioavailable noncovalent thrombin inhibitors that utilize nonbasic groups in the P1 position*. J Med Chem, 1998. **41**(17): p. 3210-9.
5. Nantermet, P.G., et al., *Design and synthesis of potent and selective macrocyclic thrombin inhibitors*. Bioorg Med Chem Lett, 2003. **13**(16): p. 2781-4.
6. Malley, M.F., et al., *Crystallographic determination of the structures of human alpha-thrombin complexed with BMS-186282 and BMS-189090*. Protein Sci, 1996. **5**(2): p. 221-8.
7. Brandstetter, H., et al., *Refined 2.3 Å X-ray crystal structure of bovine thrombin complexes formed with the benzamidine and arginine-based thrombin inhibitors NAPAP, 4-TAPAP and MQPA. A starting point for improving antithrombotics*. J Mol Biol, 1992. **226**(4): p. 1085-99.
8. Senger, S., et al., *Sulfonamide-related conformational effects and their importance in structure-based design*. Bioorg Med Chem Lett, 2007. **17**(10): p. 2931-4.
9. Weir, M.P., et al., *Novel natural product 5,5-trans-lactone inhibitors of human alpha-thrombin: mechanism of action and structural studies*. Biochemistry, 1998. **37**(19): p. 6645-57.
10. Biela, A., et al., *Impact of ligand and protein desolvation on ligand binding to the S1 pocket of thrombin*. J Mol Biol, 2012. **418**(5): p. 350-66.
11. Gerlach, C., et al., *KNOBLE: a knowledge-based approach for the design and synthesis of readily accessible small-molecule chemical probes to test protein binding*. Angew Chem Int Ed Engl, 2007. **46**(47): p. 9105-9.
12. Ye, B., et al., *Thiophene-anthranilamides as highly potent and orally available factor Xa inhibitors*. J Med Chem, 2007. **50**(13): p. 2967-80.
13. Adler, M., et al., *Crystal structures of two potent nonamidine inhibitors bound to factor Xa*. Biochemistry, 2002. **41**(52): p. 15514-23.
14. Qiao, J.X., et al., *Achieving structural diversity using the perpendicular conformation of alpha-substituted phenylcyclopropanes to mimic the bioactive conformation of ortho-substituted biphenyl P4 moieties: discovery of novel, highly potent inhibitors of Factor Xa*. Bioorg Med Chem Lett, 2008. **18**(14): p. 4118-23.
15. Pinto, D.J., et al., *1-[3-Aminobenzisoxazol-5'-yl]-3-trifluoromethyl-6-[2'-(3-(R)-hydroxy-N-pyrrolidin-yl)methyl-[1,1']-biphen-4-yl]-1,4,5,6-tetrahydropyrazolo-[3,4-c]-pyridin-7-one (BMS-740808) a highly potent, selective, efficacious, and orally bioavailable inhibitor of blood coagulation factor Xa*. Bioorg Med Chem Lett, 2006. **16**(15): p. 4141-7.
16. Nazare, M., et al., *Probing the subpockets of factor Xa reveals two binding modes for inhibitors based on a 2-carboxyindole scaffold: a study combining structure-activity relationship and X-ray crystallography*. J Med Chem, 2005. **48**(14): p. 4511-25.
17. Pinto, D.J., et al., *Discovery of 1-(4-methoxyphenyl)-7-oxo-6-(4-(2-oxopiperidin-1-yl)phenyl)-4,5,6,7-tetrahydro-1H-pyrazolo[3,4-c]pyridine-3-carboxamide (apixaban, BMS-562247), a highly potent, selective, efficacious, and orally bioavailable inhibitor of blood coagulation factor Xa*. J Med Chem, 2007. **50**(22): p. 5339-56.
18. Adler, M., et al., *Preparation, characterization, and the crystal structure of the inhibitor ZK-807834 (CI-1031) complexed with factor Xa*. Biochemistry, 2000. **39**(41): p. 12534-42.
19. Pinto, D.J., et al., *Discovery of potent, efficacious, and orally bioavailable inhibitors of blood coagulation factor Xa with neutral P1 moieties*. Bioorg Med Chem Lett, 2006. **16**(21): p. 5584-9.
20. Quan, M.L., et al., *Discovery of 1-(3'-aminobenzisoxazol-5'-yl)-3-trifluoromethyl-N-[2-fluoro-4-[(2'-dimethylaminomethyl)imidazol-1-yl]phenyl]-1H-pyrazole-5-carboxamide hydrochloride (razaxaban), a highly potent, selective, and orally bioavailable factor Xa inhibitor*. J Med Chem, 2005. **48**(6): p. 1729-44.
21. Roehrig, S., et al., *Discovery of the novel antithrombotic agent 5-chloro-N-((5S)-2-oxo-3-[4-(3-oxomorpholin-4-yl)phenyl]-1,3-oxazolidin-5-yl)methylthiophene-2-carboxamide (BAY 59-7939): an oral, direct factor Xa inhibitor*. J Med Chem, 2005. **48**(19): p. 5900-8.
22. Qiao, J.X., et al., *SAR and X-ray structures of enantiopure 1,2-cis-(1R,2S)-cyclopentylidiamine and cyclohexylidiamine derivatives as inhibitors of coagulation Factor Xa*. Bioorg Med Chem Lett, 2007. **17**(16): p. 4419-27.
23. Young, R.J., et al., *Structure- and property-based design of factor Xa inhibitors: pyrrolidin-2-ones with acyclic alanyl amides as P4 motifs*. Bioorg Med Chem Lett, 2006. **16**(23): p. 5953-7.
24. Chan, C., et al., *Factor Xa inhibitors: S1 binding interactions of a series of N-[(3S)-1-[(1S)-1-methyl-2-morpholin-4-yl-2-oxoethyl]-2-oxopyrrolidin-3-yl]sulfon amides*. J Med Chem, 2007. **50**(7): p. 1546-57.
25. Senger, S., et al., *Arylsulfonamides: a study of the relationship between activity and conformational preferences for a series of factor Xa inhibitors*. Bioorg Med Chem Lett, 2006. **16**(22): p. 5731-5.
26. Brandstetter, H., et al., *X-ray structure of active site-inhibited clotting factor Xa. Implications for drug design and substrate recognition*. J Biol Chem, 1996. **271**(47): p. 29988-92.
27. Young, R.J., et al., *Selective and dual action orally active inhibitors of thrombin and factor Xa*. Bioorg Med Chem Lett, 2007. **17**(10): p. 2927-30.
28. Hosur, M.V., et al., *Influence of stereochemistry on activity and binding modes for C2 symmetry-based diol inhibitors of HIV-1 protease*. Journal of the American Chemical Society, 1994. **116**(3): p. 847-855.



29. Andersson, H.O., et al., *Optimization of P1-P3 groups in symmetric and asymmetric HIV-1 protease inhibitors*. Eur J Biochem, 2003. **270**(8): p. 1746-58.
30. Munshi, S., et al., *An alternate binding site for the P1-P3 group of a class of potent HIV-1 protease inhibitors as a result of concerted structural change in the 80s loop of the protease*. Acta Crystallogr D Biol Crystallogr, 2000. **56**(Pt 4): p. 381-8.
31. Munshi, S., et al., *Rapid X-ray diffraction analysis of HIV-1 protease-inhibitor complexes: inhibitor exchange in single crystals of the bound enzyme*. Acta Crystallogr D Biol Crystallogr, 1998. **54**(Pt 5): p. 1053-60.
32. Ekegren, J.K., et al., *Microwave-accelerated synthesis of P1'-extended HIV-1 protease inhibitors encompassing a tertiary alcohol in the transition-state mimicking scaffold*. J Med Chem, 2006. **49**(5): p. 1828-32.
33. Wu, X., et al., *Two-carbon-elongated HIV-1 protease inhibitors with a tertiary-alcohol-containing transition-state mimic*. J Med Chem, 2008. **51**(4): p. 1053-7.
34. Schaal, W., et al., *Synthesis and comparative molecular field analysis (CoMFA) of symmetric and nonsymmetric cyclic sulfamide HIV-1 protease inhibitors*. J Med Chem, 2001. **44**(2): p. 155-69.
35. Ekegren, J.K., et al., *A new class of HIV-1 protease inhibitors containing a tertiary alcohol in the transition-state mimicking scaffold*. J Med Chem, 2005. **48**(25): p. 8098-102.
36. Abdel-Meguid, S.S., et al., *An orally bioavailable HIV-1 protease inhibitor containing an imidazole-derived peptide bond replacement: crystallographic and pharmacokinetic analysis*. Biochemistry, 1994. **33**(39): p. 11671-7.
37. Thaisrivongs, S., et al., *Structure-based design of novel HIV protease inhibitors: carboxamide-containing 4-hydroxycoumarins and 4-hydroxy-2-pyrones as potent nonpeptidic inhibitors*. J Med Chem, 1995. **38**(18): p. 3624-37.
38. Blum, A., et al., *Structure-guided design of C2-symmetric HIV-1 protease inhibitors based on a pyrrolidine scaffold*. J Med Chem, 2008. **51**(7): p. 2078-87.
39. Hoog, S.S., et al., *A check on rational drug design: crystal structure of a complex of human immunodeficiency virus type 1 protease with a novel gamma-turn mimetic inhibitor*. J Med Chem, 1995. **38**(17): p. 3246-52.
40. Blum, A., et al., *Achiral oligoamines as versatile tool for the development of aspartic protease inhibitors*. Bioorg Med Chem, 2008. **16**(18): p. 8574-86.
41. Lee, T., et al., *Discovery of Potent Myeloid Cell Leukemia-1 (Mcl-1) Inhibitors That Demonstrate in Vivo Activity in Mouse Xenograft Models of Human Cancer*. J Med Chem, 2019. **62**(8): p. 3971-3988.
42. Caenepeel, S., et al., *AMG 176, a Selective MCL1 Inhibitor, Is Effective in Hematologic Cancer Models Alone and in Combination with Established Therapies*. Cancer Discov, 2018. **8**(12): p. 1582-1597.
43. Rescourio, G., et al., *Discovery and in Vivo Evaluation of Macrocyclic Mcl-1 Inhibitors Featuring an alpha-Hydroxy Phenylacetic Acid Pharmacophore or Bioisostere*. J Med Chem, 2019. **62**(22): p. 10258-10271.
44. Pelz, N.F., et al., *Discovery of 2-Indole-acylsulfonamide Myeloid Cell Leukemia 1 (Mcl-1) Inhibitors Using Fragment-Based Methods*. J Med Chem, 2016. **59**(5): p. 2054-66.
45. Shaw, S., et al., *Optimization of Potent and Selective Tricyclic Indole Diazepinone Myeloid Cell Leukemia-1 Inhibitors Using Structure-Based Design*. J Med Chem, 2018. **61**(6): p. 2410-2421.
46. Bruncko, M., et al., *Structure-guided design of a series of MCL-1 inhibitors with high affinity and selectivity*. J Med Chem, 2015. **58**(5): p. 2180-94.
47. Lee, T., et al., *Discovery and biological characterization of potent myeloid cell leukemia-1 inhibitors*. FEBS Lett, 2017. **591**(1): p. 240-251.
48. Szlavik, Z., et al., *Structure-Guided Discovery of a Selective Mcl-1 Inhibitor with Cellular Activity*. J Med Chem, 2019. **62**(15): p. 6913-6924.
49. Friberg, A., et al., *Discovery of potent myeloid cell leukemia 1 (Mcl-1) inhibitors using fragment-based methods and structure-based design*. J Med Chem, 2013. **56**(1): p. 15-30.
50. Burke, J.P., et al., *Discovery of tricyclic indoles that potently inhibit Mcl-1 using fragment-based methods and structure-based design*. J Med Chem, 2015. **58**(9): p. 3794-805.
51. Chu, X.J., et al., *Discovery of [4-Amino-2-(1-methanesulfonylpiperidin-4-ylamino)pyrimidin-5-yl](2,3-difluoro-6-methoxyphenyl)methanone (R547), a potent and selective cyclin-dependent kinase inhibitor with significant in vivo antitumor activity*. J Med Chem, 2006. **49**(22): p. 6549-60.
52. Hole, A.J., et al., *Comparative structural and functional studies of 4-(thiazol-5-yl)-2-(phenylamino)pyrimidine-5-carbonitrile CDK9 inhibitors suggest the basis for isotype selectivity*. J Med Chem, 2013. **56**(3): p. 660-70.
53. Moshinsky, D.J., et al., *SU9516: biochemical analysis of cdk inhibition and crystal structure in complex with cdk2*. Biochem Biophys Res Commun, 2003. **310**(3): p. 1026-31.
54. Misra, R.N., et al., *N-(cycloalkylamino)acyl-2-aminothiazole inhibitors of cyclin-dependent kinase 2. N-[5-[[[5-(1,1-dimethylethyl)-2-oxazolyl]methyl]thio]-2-thiazolyl]-4-piperidinecarboxamide (BMS-387032), a highly efficacious and selective antitumor agent*. J Med Chem, 2004. **47**(7): p. 1719-28.
55. Wang, S., et al., *2-Anilino-4-(thiazol-5-yl)pyrimidine CDK inhibitors: synthesis, SAR analysis, X-ray crystallography, and biological activity*. J Med Chem, 2004. **47**(7): p. 1662-75.
56. Berg, S., et al., *Discovery of novel potent and highly selective glycogen synthase kinase-3beta (GSK3beta) inhibitors for Alzheimer's disease: design, synthesis, and characterization of pyrazines*. J Med Chem, 2012. **55**(21): p. 9107-19.
57. Wu, S.Y., et al., *Discovery of a novel family of CDK inhibitors with the program LIDAEUS: structural basis for ligand-induced disordering of the activation loop*. Structure, 2003. **11**(4): p. 399-410.
58. Hamdouchi, C., et al., *The discovery of a new structural class of cyclin-dependent kinase inhibitors, aminoimidazo[1,2-a]pyridines*. Mol Cancer Ther, 2004. **3**(1): p. 1-9.
59. Echaliier, A., et al., *An integrated chemical biology approach provides insight into Cdk2 functional redundancy and inhibitor sensitivity*. Chem Biol, 2012. **19**(8): p. 1028-40.
60. Shao, H., et al., *Substituted 4-(thiazol-5-yl)-2-(phenylamino)pyrimidines are highly active CDK9 inhibitors: synthesis, X-ray crystal structures, structure-activity relationship, and anticancer activities*. J Med Chem, 2013. **56**(3): p. 640-59.

61. Arris, C.E., et al., *Identification of novel purine and pyrimidine cyclin-dependent kinase inhibitors with distinct molecular interactions and tumor cell growth inhibition profiles*. J Med Chem, 2000. **43**(15): p. 2797-804.
62. Clare, P.M., et al., *The cyclin-dependent kinases cdk2 and cdk5 act by a random, anticooperative kinetic mechanism*. J Biol Chem, 2001. **276**(51): p. 48292-9.
63. Sayle, K.L., et al., *Structure-based design of 2-arylamino-4-cyclohexylmethyl-5-nitroso-6-aminopyrimidine inhibitors of cyclin-dependent kinases 1 and 2*. Bioorg Med Chem Lett, 2003. **13**(18): p. 3079-82.
64. Beattie, J.F., et al., *Cyclin-dependent kinase 4 inhibitors as a treatment for cancer. Part 1: identification and optimisation of substituted 4,6-bis anilino pyrimidines*. Bioorg Med Chem Lett, 2003. **13**(18): p. 2955-60.
